# Supplementary material for: Automated and assisted RNA resonance assignment using NMR chemical shift statistics
Source: PubMed Central journal article supplement — Nucleic Acids Res. 2013 Aug 5;41(18):e172. doi: 10.1093/nar/gkt665 (PMC3794610; doi:10.1093/nar/gkt665), 2013-08-05
Supplement: supp_gkt665_nar-00555-met-k-2013-File008.pdf [file supp_gkt665_nar-00555-met-k-2013-File008.pdf]

# Supplementary Data

## Automated and assisted RNA resonance assignment using NMR chemical shift statistics

**Thomas Aeschbacher<sup>1</sup>, Elena Schmidt<sup>2</sup>, Markus Blatter<sup>1</sup>, Christophe Maris<sup>1</sup>,  
Olivier Duss<sup>1</sup>, Frédéric H.-T. Allain<sup>1</sup>, Peter Güntert<sup>2,3</sup> and Mario Schubert<sup>1</sup>**

<sup>1</sup>Institute of Molecular Biology and Biophysics, ETH Zürich, 8093 Zurich, Switzerland, <sup>2</sup>Institute of Biophysical Chemistry, Center for Biomolecular Magnetic Resonance, and Frankfurt Institute of Advanced Studies, 60438 Frankfurt am Main, Germany, <sup>3</sup>Graduate School of Science and Engineering, Tokyo Metropolitan University, Hachioji, Tokyo 192-0397, Japan

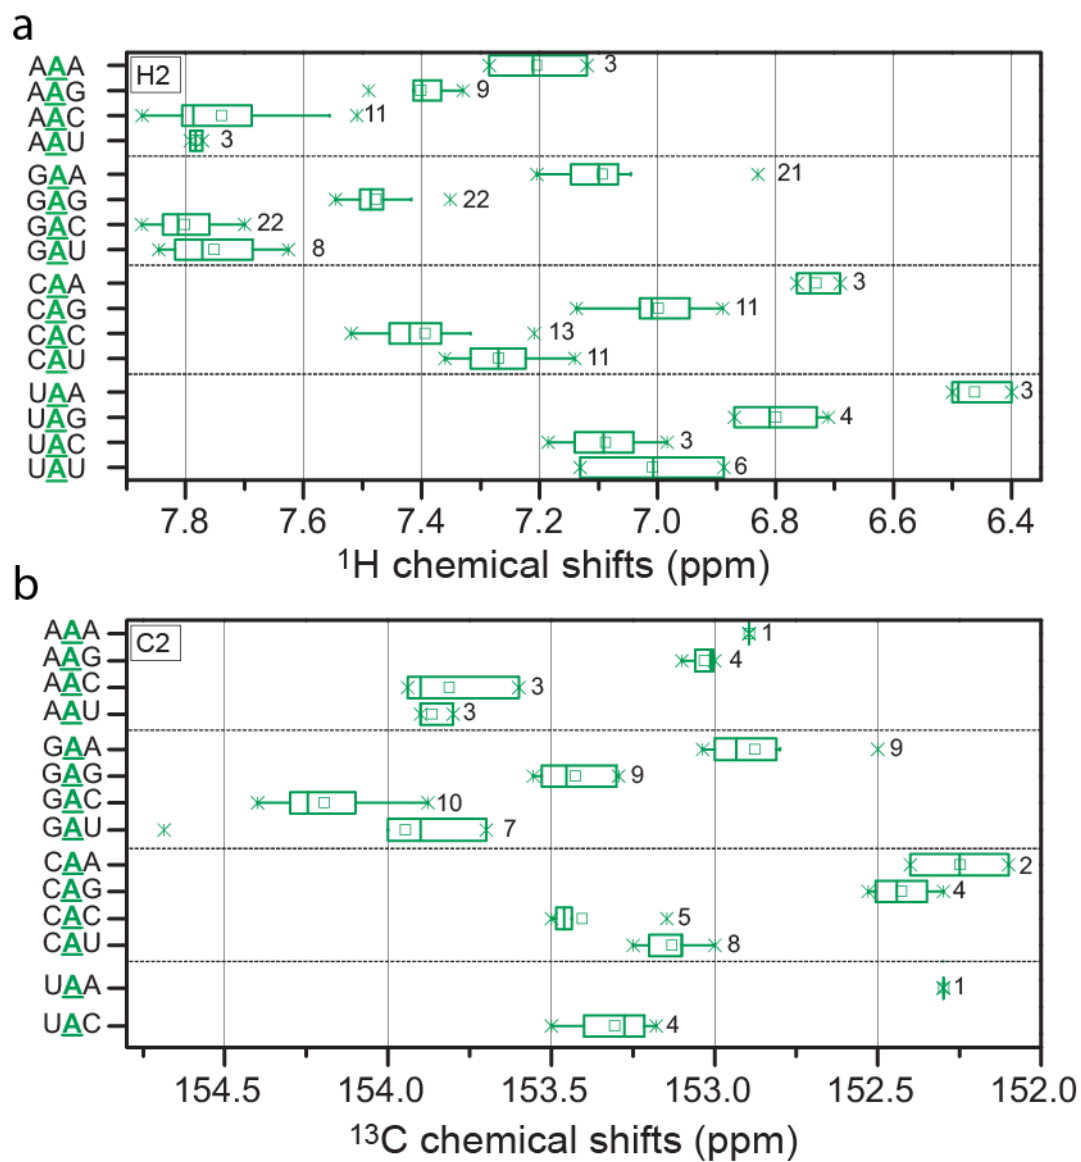

**Figure S1.** Box plots of adenosine H2 (a) and C2 (b) chemical shifts for Watson-Crick base-paired triplets. See Figure 1 for details.

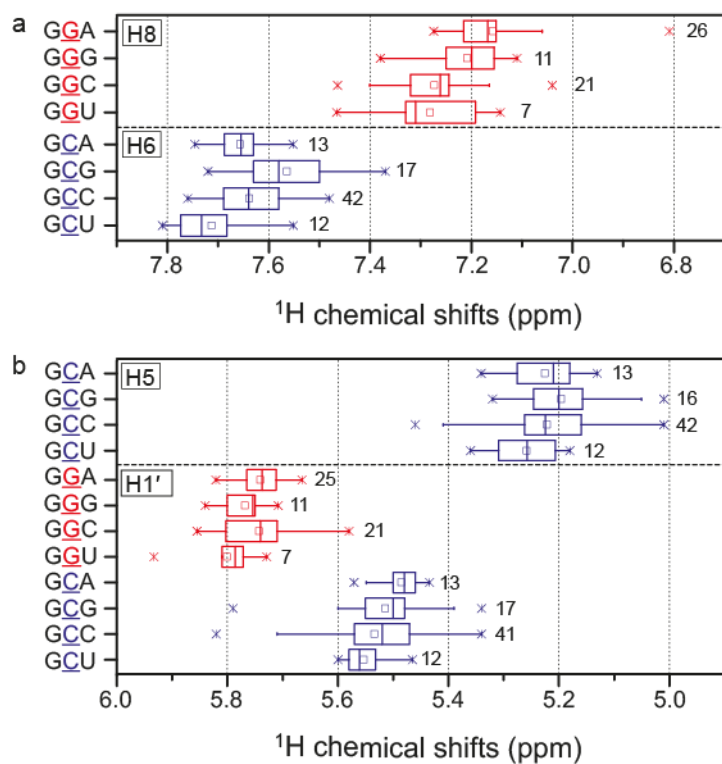

**Figure S2.** Influence of the 3' neighboring nucleotide on <sup>1</sup>H chemical shifts illustrated with highly abundant Watson-Crick base-paired triplets. (a) <sup>1</sup>H chemical shift statistics of H8 within GGX and H6 within GCX. The number of data points is given next to each box plot. (b) <sup>1</sup>H chemical shift statistics of H5 within GCX triplets and of H1' within GGX and GCX triplets.

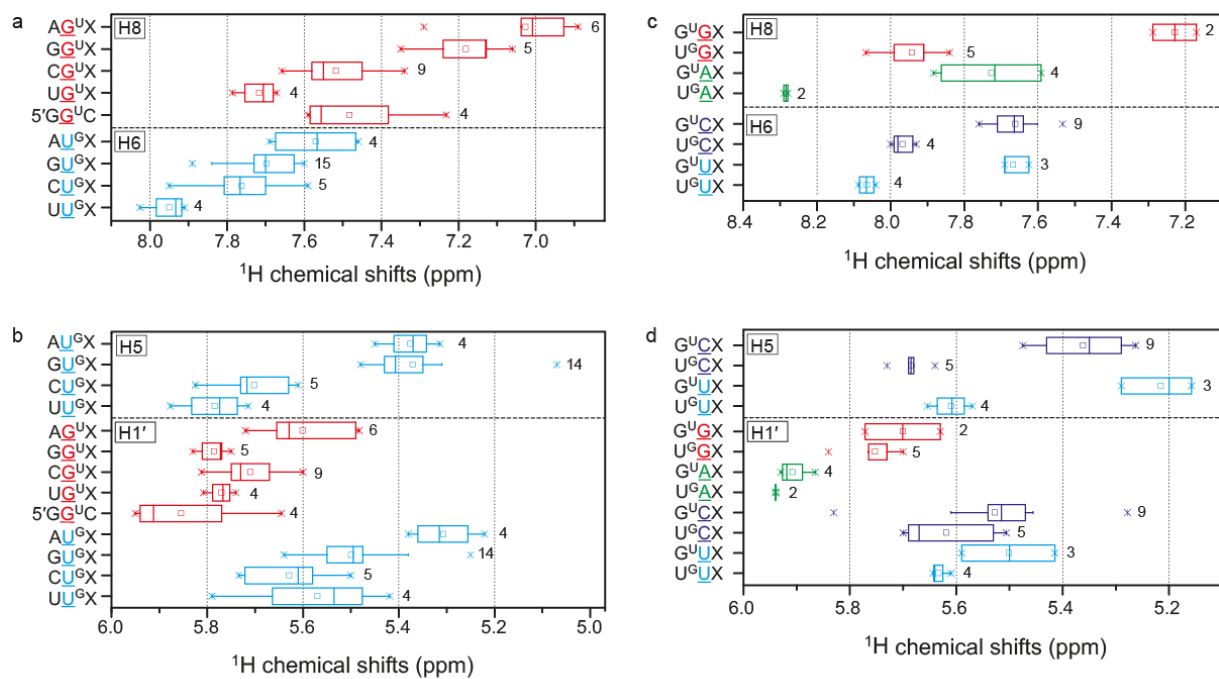

**Figure S3.** Influence of G•U wobble base-pairs on  $^1\text{H}$  chemical shifts. (a)  $^1\text{H}$  chemical shift statistics of H8 and H6 of G•U wobble base-pairs flanked by two Watson-Crick base-pairs. The number of data points is given next to each box plot. (b)  $^1\text{H}$  chemical shift statistics of H5 and H1' of G•U wobble base-pairs flanked by two Watson-Crick base-pairs. (c)  $^1\text{H}$  chemical shift statistics of H8 and H6 of nucleotides that follow a G•U wobble base-pairs. Considered are base-pair triplets containing a wobble base-pair followed by two Watson-Crick base-pairs. (d)  $^1\text{H}$  chemical shift statistics of H5 and H1' of nucleotides that follow a G•U wobble base-pairs.

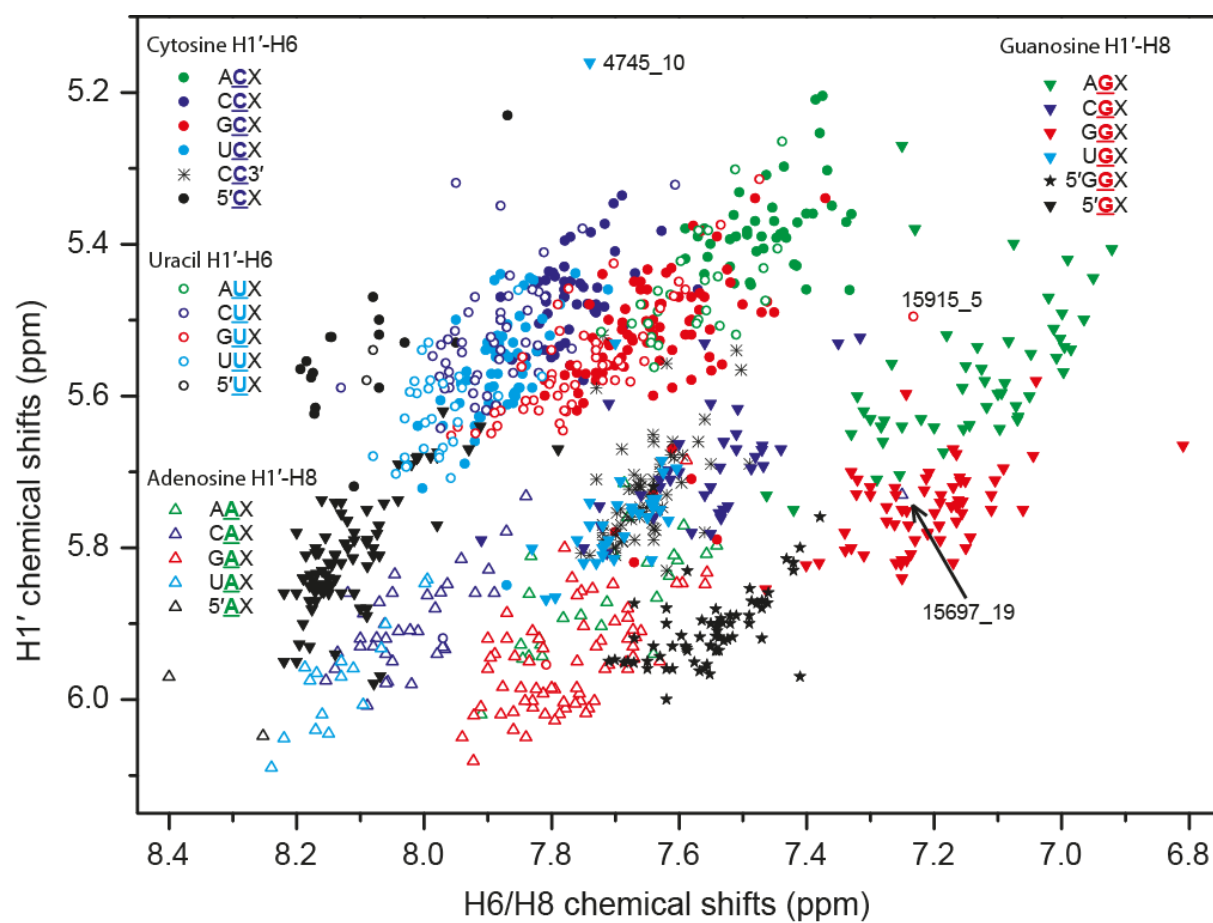

**Figure S4.** Intranucleotide H1'-H6/H8 chemical shift correlations for Watson-Crick base-paired triplets. Extreme outliers are labeled with the BMRB accession code and the residue number.

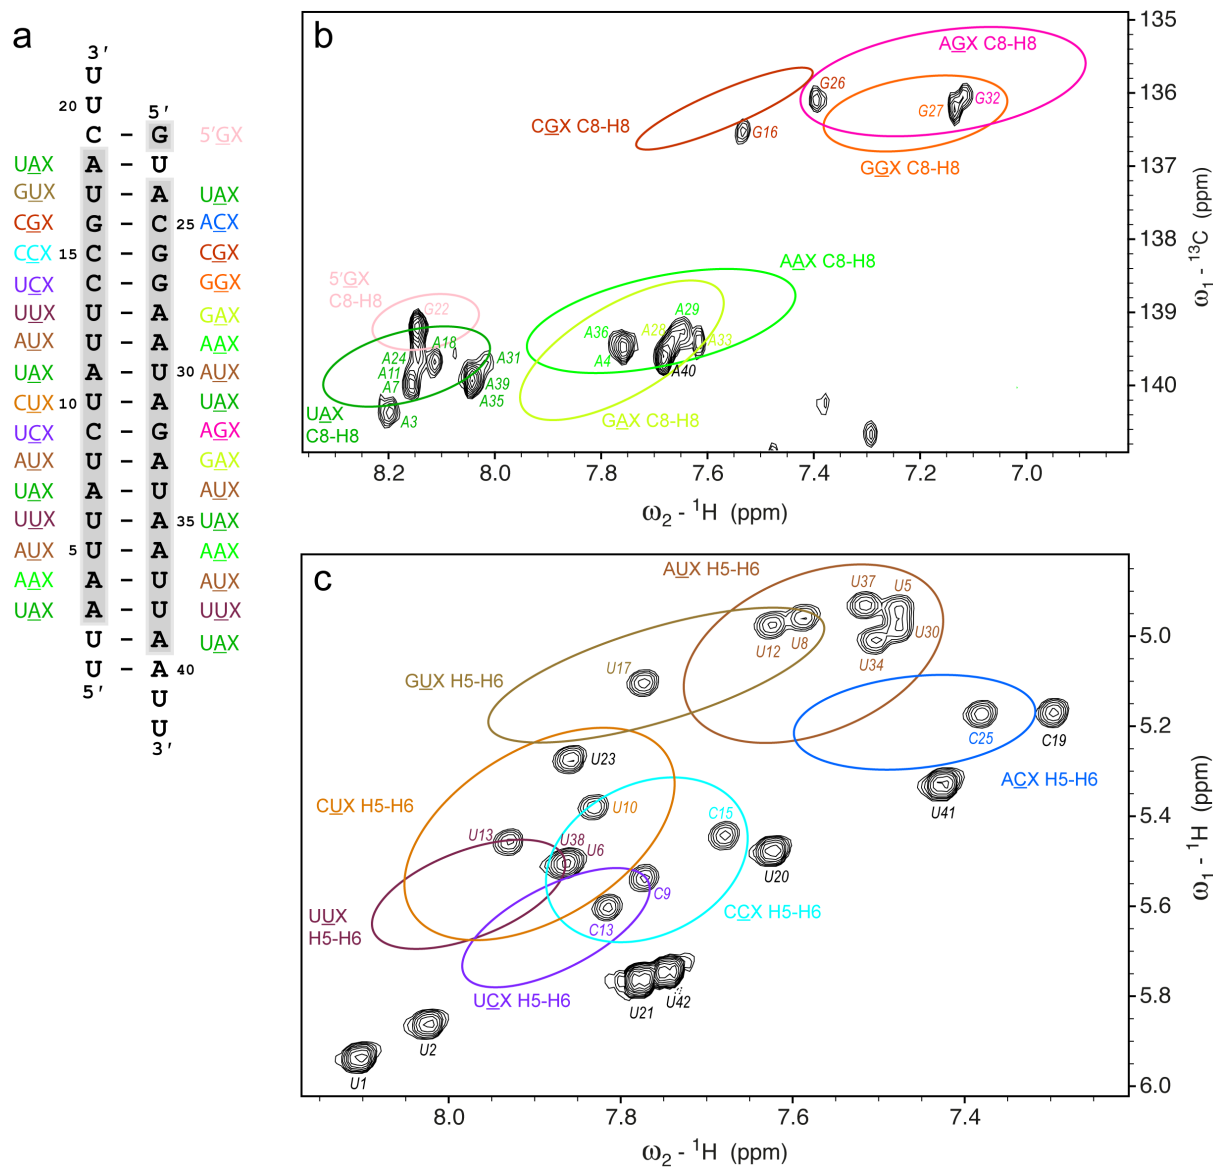

**Figure S5.** Assisted assignment of the small interfering RNA ELAVL1 (42 nts) using 2D chemical shift statistics. (a) Schematic presentation of the RNA sequence. For the grey highlighted nucleotides 2D chemical shift statistics/ellipses are available. For each of those nucleotides the corresponding categories of the statistics are given with a color code. (b) Natural abundance  $^{13}\text{C}$ -HSQC of ELAVL1 recorded with 50 transients at 750 MHz and 313 K displaying purine C8-H8 correlations. 2D statistics are indicated by ellipses (86%) that are color-coded as in panel a. The final assignments for each signal is given in italic using the same color code. G22 can be readily assigned as the solely signal in the ellipse of 5'GX. For other signals the assignment ambiguity can significantly be reduced. The signals of G16 and G26 are examples of the unusual case that the signals are slightly outside the 86% ellipse. (c) 2D TOCSY spectrum of ELAVL1 recorded with 2 transients at 750 MHz and 313 K displaying pyrimidine H5-H6 correlations. Statistics are displayed in form of ellipses (86%) and the final assignments are given in italic. The same color code is used as in panel a. Black labels indicate nucleotides that are in a non-regular environment for which 2D statistics were not derived mainly due to an insufficient amount of data. C25 can be readily assigned. The statistics were also very helpful to assign the signals of C9, C13, U17 to name a few. Together with the 1D statistics and a 2D NOESY the nonexchangeable protons of H8, H6, H5, H2 and H1' could be assigned in a straight-forward way without the requirement of isotope labeling and the recording of 3D spectra.

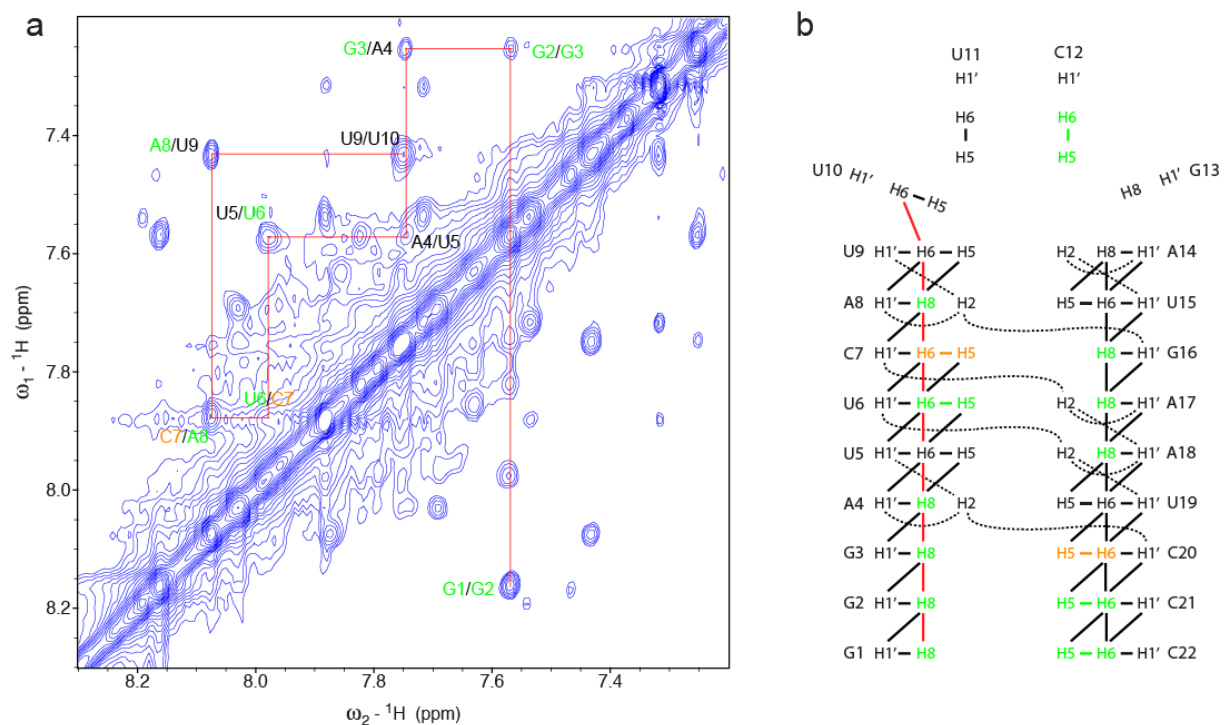

**Figure S6.** Linking starting points by conventional assignment walks. (a) Region of a 2D NOESY spectrum of TASL1 recorded in D<sub>2</sub>O at 700 MHz. The H8/H6–H8/H6 assignment walk between nucleotides G1 to U10 is shown by red lines. Resonances of unambiguous starting points are colored green. Ambiguous starting points are shown in orange. (b) Schematic presentation of TASL1 indicating expected NOE patterns. Starting points are color-coded as in panel a. The same H8/H6–H8/H6 assignment walk as indicated in the NOESY spectrum is shown by red lines.

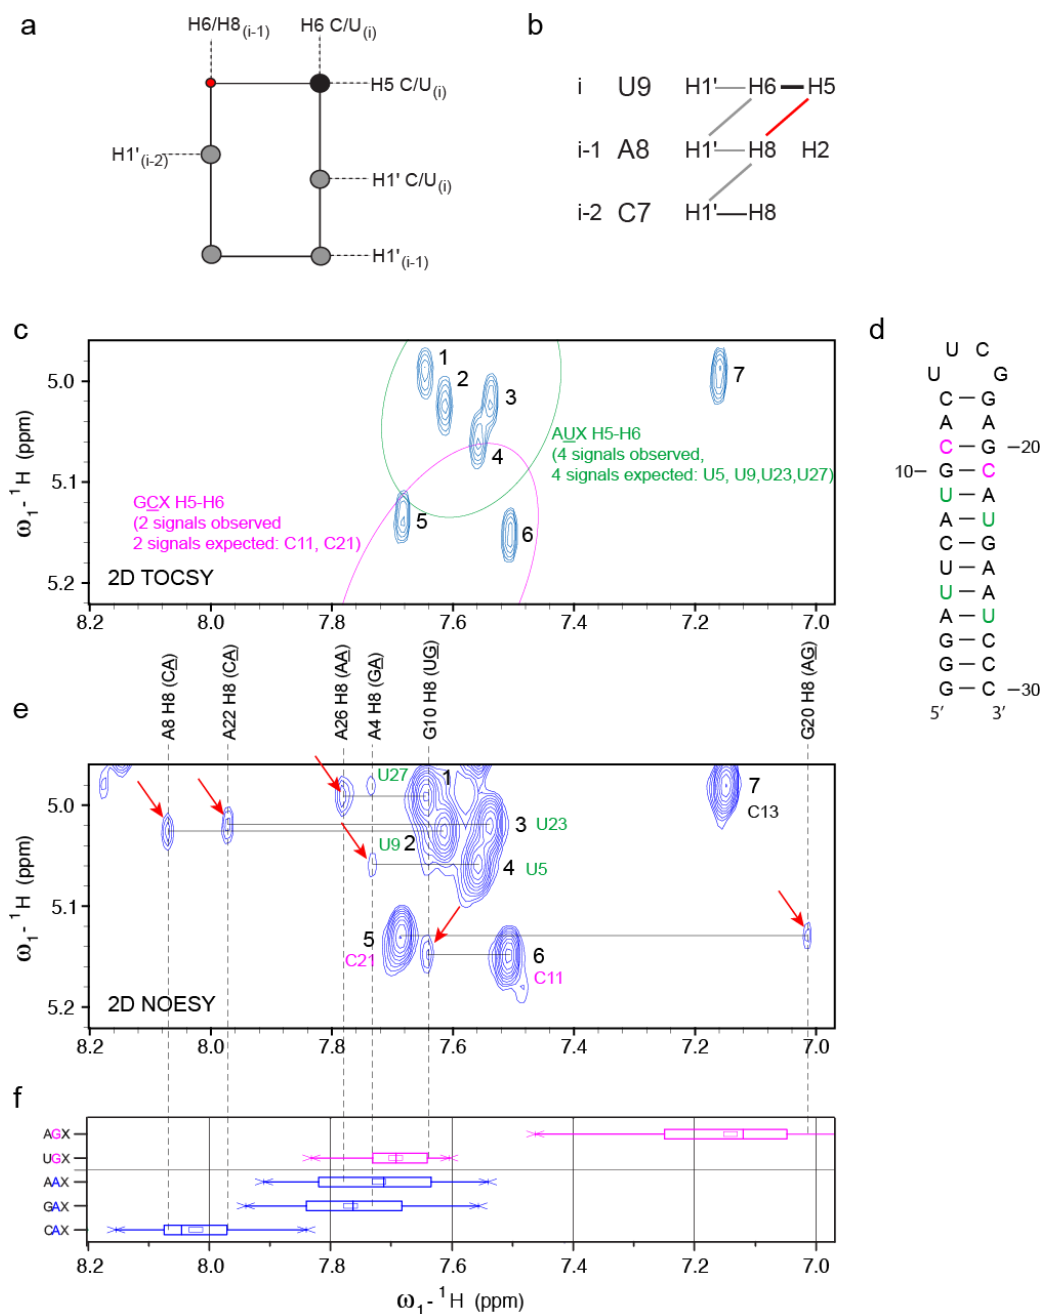

**Figure S7.** Combined use of 2D and 1D statistics. (a) NOE pattern expected for a pyrimidine (residue  $i$ ) following a purine (residue  $i - 1$ ). The NOE signals of the H1'-H6/H8 assignment walk are indicated in grey, strong intra-base pyrimidine H5-H6 NOEs are colored black and H5-H8 <sub>$i - 1$</sub>  correlations between pyrimidines and purines are colored red. (b) Example of an RNA sequence in which the same NOE correlations are shown schematically. The same color code is used. (c) Region of a 2D TOCSY spectrum of TASL3 with overlaid covariance ellipses for the categories AUX and GCX. From the C5 chemical shift it is apparent that signals 1-4 are from uracils and signals 5-7 from cytosines. (d) Secondary structure of TASL3 with color-coded pyrimidines that belong to AUX and GCX triplets. For simplicity C11 is included in category GCX although its following nucleotide is not Watson-Crick base paired. (e) Region of a 2D NOESY spectrum corresponding to panel c. H5-H8 <sub>$i - 1$</sub>  correlations between pyrimidines and preceding purines are indicated by red arrows. (f) Statistics of purine H8 chemical shifts of triplets that occur in the sequence. The x-axis matches to the 2D NOESY spectrum shown in panel e.



**Table S1.** List of all RNA chemical shift entries from the BMRB databank complemented with data of 14 structures found in publications (denoted by their PDB accession codes). Chemical shifts in a Watson-Crick environment were evaluated prior to their use in statistics. Carbon chemical shifts that were evaluated using a set of reference points as described in a previous paper (8) were only used if a set of reference chemical shifts was present and found in the expected ranges. Some datasets could partially be used and some datasets could be used after recalibration. Outliers that are not caused by a systematical mistake were only excluded if they were far off. Proton chemical shifts were excluded, if the chemical shift value differed by more than 0.4 ppm of the median value of the corresponding category. Carbon chemical shifts were excluded if they differed by more than 2 ppm of the median value of the corresponding category.

| BMRB number or PDB code <sup>a</sup> | <sup>13</sup> C chemical shifts <sup>b</sup> | Category of <sup>13</sup> C data <sup>b</sup> | Number of nucleotides | Excluded shifts     |
|--------------------------------------|----------------------------------------------|-----------------------------------------------|-----------------------|---------------------|
| 4120                                 | not used                                     | IV                                            | 44                    |                     |
| 4125                                 | absent                                       | -                                             | 31                    |                     |
| 4135                                 | absent                                       | -                                             | 9+9                   |                     |
| 4175                                 | absent                                       | -                                             | 20                    |                     |
| 4226                                 | used                                         | I                                             | 30                    | Res 25 C2           |
| 4250                                 | absent                                       | -                                             | 23                    |                     |
| 4253                                 | not used                                     | IV                                            | 36                    |                     |
| 4346                                 | used                                         | I                                             | 33                    |                     |
| 4614                                 | absent                                       | -                                             | 10                    |                     |
| 4745                                 | absent                                       | -                                             | 13+12                 | Strand 2 Res 10 H1' |
| 4750                                 | absent                                       | -                                             | 28                    |                     |
| 4780                                 | used                                         | Ila                                           | 19                    | Res 1 C8, Res 4 H1' |
| 4816                                 | not used                                     | IV                                            | 31                    |                     |
| 5007                                 | not used                                     | III                                           | 30                    |                     |
| 5023                                 | absent                                       | -                                             | 13                    |                     |
| 5046                                 | absent                                       | -                                             | 10                    |                     |
| 5170                                 | partially used                               | Ilb                                           | 28                    | C2, C5 and C1'      |
| 5193                                 | absent                                       | -                                             | 13                    |                     |
| 5256                                 | used                                         | I                                             | 17                    |                     |
| 5259                                 | used                                         | I                                             | 17                    |                     |
| 5278                                 | not used                                     | IV                                            | 33                    |                     |
| 5321                                 | absent                                       | -                                             | 29                    |                     |
| 5371                                 | used                                         | I                                             | 24                    |                     |
| 5394                                 | absent                                       | -                                             | 9+10                  |                     |
| 5395                                 | absent                                       | -                                             | 9+10                  |                     |
| 5528                                 | absent                                       | -                                             | 25                    |                     |
| 5530                                 | absent                                       | -                                             | 17                    |                     |
| 5531                                 | absent                                       | -                                             | 17                    |                     |
| 5553                                 | not used                                     | IV                                            | 31                    |                     |
| 5559                                 | not used                                     | IV                                            | 20                    |                     |
| 5586                                 | absent                                       | -                                             | 9                     |                     |
| 5587                                 | absent                                       | -                                             | 9                     |                     |
| 5588                                 | absent                                       | -                                             | 9                     |                     |

| BMRB number or PDB code <sup>a</sup> | <sup>13</sup> C chemical shifts <sup>b</sup> | Category of <sup>13</sup> C data <sup>b</sup> | Number of nucleotides | Excluded shifts                                  |
|--------------------------------------|----------------------------------------------|-----------------------------------------------|-----------------------|--------------------------------------------------|
| 5614                                 | absent                                       | -                                             | 9                     |                                                  |
| 5632                                 | not used                                     | III                                           | 30                    |                                                  |
| 5655                                 | used                                         | I                                             | 24                    | C2', C3' not used, Res22 C1'                     |
| 5703                                 | not used                                     | IIId                                          | 24                    |                                                  |
| 5705                                 | used                                         | I                                             | 14                    |                                                  |
| 5773                                 | not used                                     | III                                           | 36                    |                                                  |
| 5834 <sup>c</sup>                    | partially used                               | I                                             | 22                    | C2, C6 and C8 resonances of Ade and Ura excluded |
| 5852                                 | used                                         | I                                             | 23                    |                                                  |
| 5919                                 | partially used                               | IIb                                           | 42                    | C1' resonances excluded, Res 10 C6               |
| 5932                                 | partially used                               | IIb                                           | 15                    | C1' resonances excluded                          |
| 5962                                 | used                                         | I                                             | 36                    | Res 1 C1'                                        |
| 5980                                 | absent                                       | -                                             | 10                    |                                                  |
| 6042 <sup>d</sup>                    | absent                                       | -                                             | 30                    |                                                  |
| 6062                                 | used                                         | IIa                                           | 23                    |                                                  |
| 6076 (1)                             | used                                         | I                                             | 34                    |                                                  |
| 6076 (2)                             | absent                                       | -                                             | 34                    |                                                  |
| 6077 (1)                             | used                                         | I                                             | 34                    | C5 of Res 11 and 12                              |
| 6077 (2)                             | absent                                       | -                                             | 34                    |                                                  |
| 6094                                 | not used                                     | IV                                            | 101                   |                                                  |
| 6115                                 | absent                                       | -                                             | 34                    |                                                  |
| 6239                                 | not used                                     | III                                           | 22                    |                                                  |
| 6320                                 | not used                                     | III                                           | 32                    |                                                  |
| 6477                                 | not used                                     | IV                                            | 47                    |                                                  |
| 6485 <sup>e</sup>                    | used                                         | I                                             | 27                    |                                                  |
| 6509                                 | not used                                     | IV                                            | 31                    |                                                  |
| 6543                                 | used                                         | I                                             | 45                    | Res 4 C1'                                        |
| 6562 (1)                             | not used                                     | IV                                            | 18                    |                                                  |
| 6562 (2)                             | not used                                     | IV                                            | 18                    |                                                  |
| 6633                                 | not used                                     | IIId                                          | 41                    |                                                  |
| 6652                                 | not used                                     | IV                                            | 43                    |                                                  |
| 6756                                 | not used                                     | III                                           | 27                    |                                                  |
| 6979                                 | absent                                       | -                                             | 10+10                 |                                                  |
| 7090                                 | not used                                     | III                                           | 18                    |                                                  |
| 7098                                 | used                                         | I                                             | 35                    | Res 25 C2'                                       |
| 7230                                 | absent                                       | -                                             | 9+9                   |                                                  |
| 7403                                 | used (recal.)                                | IIc                                           | 24                    |                                                  |
| 7404                                 | used (recal.)                                | IIc                                           | 23                    |                                                  |
| 7405                                 | used (recal.)                                | IIc                                           | 18                    | Res 15 C6, Res 15 C1'                            |
| 10014                                | absent                                       | -                                             | 12                    |                                                  |
| 10018                                | absent                                       | -                                             | 36                    |                                                  |
| 15080                                | used                                         | I                                             | 20                    |                                                  |
| 15081                                | not used                                     | IV                                            | 20                    |                                                  |
| 15157                                | absent                                       | -                                             | 8                     |                                                  |
| 15319                                | absent                                       | -                                             | 17                    |                                                  |
| 15331                                | absent                                       | -                                             | 17                    |                                                  |
| 15342                                | absent                                       | -                                             | 17                    |                                                  |
| 15362                                | absent                                       | -                                             | 17                    |                                                  |
| 15417                                | used                                         | I                                             | 34                    |                                                  |

| BMRB number or PDB code <sup>a</sup> | <sup>13</sup> C chemical shifts <sup>b</sup> | Category of <sup>13</sup> C data <sup>b</sup> | Number of nucleotides | Excluded shifts                       |
|--------------------------------------|----------------------------------------------|-----------------------------------------------|-----------------------|---------------------------------------|
| 15538                                | not used                                     | III                                           | 29                    |                                       |
| 15571                                | used                                         | I                                             | 10+10                 |                                       |
| 15572                                | used                                         | I                                             | 11+10                 |                                       |
| 15656 (1)                            | not used                                     | III                                           | 29                    |                                       |
| 15656 (2)                            | partially used                               | IIb                                           | 29                    | C5 shifts excluded                    |
| 15656 (3)                            | absent                                       | -                                             | 29                    |                                       |
| 15697                                | absent                                       | -                                             | 22                    | Res 19 H8                             |
| 15745                                | not used                                     | IV                                            | 22                    |                                       |
| 15780                                | used                                         | I                                             | 9+8                   |                                       |
| 15781                                | used                                         | I                                             | 9+8                   |                                       |
| 15786 (1)                            | not used                                     | III                                           | 37                    |                                       |
| 15786 (2)                            | partially used                               | IIb                                           | 37                    | C2, C5, C6 and C8 resonances excluded |
| 15856                                | not used                                     | III                                           | 29                    |                                       |
| 15858                                | not used                                     | IV                                            | 7+7                   |                                       |
| 15859                                | not used                                     | III                                           | 22                    |                                       |
| 15869                                | used (recal.)                                | IIc                                           | 30                    |                                       |
| 15915 (1)                            | absent                                       | -                                             | 12+12                 | Strand 2 Res 5 H6                     |
| 15915 (2)                            | absent                                       | -                                             | 12+12                 | Strand 2 Res 5 H6                     |
| 17326                                | used                                         | I                                             | 20                    |                                       |
| 17559                                | used                                         | I                                             | 22                    |                                       |
| 17560                                | used                                         | I                                             | 21                    |                                       |
| 17566                                | used                                         | I                                             | 22                    |                                       |
| 17567                                | used                                         | I                                             | 26                    |                                       |
| 17568                                | used                                         | I                                             | 30                    |                                       |
| 17RA                                 | used                                         | I                                             | 21                    |                                       |
| 1AFX                                 | partially used                               | IIb                                           | 12                    | C2, C5, C6 and C8 resonances excluded |
| 1ATO                                 | absent                                       | -                                             | 19                    |                                       |
| 1C00                                 | absent                                       | -                                             | 14                    |                                       |
| 1EBR                                 | absent                                       | -                                             | 30                    |                                       |
| 1MIS                                 | absent                                       | -                                             | 8                     |                                       |
| 1MWG                                 | absent                                       | -                                             | 8                     |                                       |
| 1PBM                                 | absent                                       | -                                             | 6                     |                                       |
| 1QES                                 | absent                                       | -                                             | 30                    |                                       |
| 1RHT                                 | absent                                       | -                                             | 24                    |                                       |
| 1RNG                                 | not used                                     | IV                                            | 12                    |                                       |
| 1SCL                                 | used (recal.)                                | IIc                                           | 29                    |                                       |
| 1UUU                                 | used (recal.)                                | I                                             | 19                    |                                       |
| 1YFV                                 | not used                                     | IIId                                          | 8                     |                                       |

<sup>a</sup> For entries containing two or more sets of chemical shifts, the individual lists are indicated by numbers in brackets.

<sup>b</sup> The <sup>13</sup>C chemical shifts were evaluated according to Aeschbacher et al. (8). <sup>13</sup>C data classified in category I and IIa was used, category II b was partially used, category IIc was used after re-referencing and categories IIId, III and IV were excluded.

<sup>c</sup> C6 shifts of uridines and C8 shifts of adenosines are shifted by around 2.7 ppm. Since RNA selectively labeled at uridines and adenosines was used, we suspect that the spectrum of the AU labeled RNA was not calibrated properly.

<sup>d</sup> Entry contains only coupling constants.

<sup>e</sup> The initial entry was corrected 2011, see Aeschbacher et al. (8).

**Table S2.** 1D statistical values of all different categories of analyzed chemical shifts displayed in Figure 1 and Supplementary Figure 1.

|                           | <i>N</i> | Mean  | Std   | Sum     | Skew   | Min   | 25 <sup>th</sup> Perc. | Median | 75 <sup>th</sup> Perc. | Max   |
|---------------------------|----------|-------|-------|---------|--------|-------|------------------------|--------|------------------------|-------|
| <b>H8 chemical shifts</b> |          |       |       |         |        |       |                        |        |                        |       |
| <b>AGX</b>                | 50       | 7.142 | 0.128 | 357.094 | 0.422  | 6.921 | 7.048                  | 7.123  | 7.250                  | 7.463 |
| <b>GGX</b>                | 65       | 7.214 | 0.098 | 468.907 | -0.827 | 6.809 | 7.162                  | 7.212  | 7.261                  | 7.464 |
| <b>GGGA</b>               | 26       | 7.158 | 0.092 | 186.12  | -2.295 | 6.809 | 7.151                  | 7.168  | 7.215                  | 7.274 |
| <b>GGG</b>                | 11       | 7.209 | 0.073 | 79.30   | 1.179  | 7.110 | 7.155                  | 7.199  | 7.250                  | 7.380 |
| <b>GGC</b>                | 21       | 7.274 | 0.087 | 152.75  | -0.436 | 7.040 | 7.244                  | 7.262  | 7.320                  | 7.464 |
| <b>GGU</b>                | 7        | 7.282 | 0.109 | 50.97   | 0.482  | 7.143 | 7.192                  | 7.310  | 7.330                  | 7.466 |
| <b>G<sup>U</sup>GX</b>    | 2        | 7.229 | 0.083 | 14.46   | --     | 7.170 | 7.170                  | 7.229  | 7.288                  | 7.288 |
| <b>CGX</b>                | 43       | 7.568 | 0.107 | 325.436 | 0.547  | 7.316 | 7.510                  | 7.550  | 7.630                  | 7.910 |
| <b>UGX</b>                | 33       | 7.695 | 0.057 | 253.926 | 0.489  | 7.604 | 7.643                  | 7.697  | 7.730                  | 7.831 |
| <b>U<sup>G</sup>GX</b>    | 5        | 7.943 | 0.087 | 39.72   | 0.510  | 7.840 | 7.910                  | 7.910  | 7.990                  | 8.067 |
| <b>5'GGX</b>              | 68       | 7.553 | 0.076 | 513.610 | -0.036 | 7.379 | 7.513                  | 7.546  | 7.610                  | 7.710 |
| <b>5'GX</b>               | 87       | 8.114 | 0.076 | 705.960 | -1.547 | 7.790 | 8.080                  | 8.140  | 8.169                  | 8.220 |
| <b>A<sup>G</sup>UX</b>    | 6        | 7.027 | 0.141 | 42.16   | 1.570  | 6.890 | 6.927                  | 7.009  | 7.038                  | 7.290 |
| <b>G<sup>G</sup>UX</b>    | 5        | 7.18  | 0.114 | 35.91   | 0.809  | 7.060 | 7.128                  | 7.130  | 7.240                  | 7.350 |
| <b>C<sup>G</sup>UX</b>    | 9        | 7.519 | 0.105 | 67.67   | -0.682 | 7.340 | 7.450                  | 7.550  | 7.580                  | 7.658 |
| <b>U<sup>G</sup>UX</b>    | 4        | 7.717 | 0.050 | 30.87   | 1.070  | 7.671 | 7.681                  | 7.706  | 7.754                  | 7.786 |
| <b>5'G<sup>G</sup>UX</b>  | 4        | 7.484 | 0.170 | 29.94   | -1.876 | 7.232 | 7.383                  | 7.557  | 7.585                  | 7.590 |
| <b>AAAX</b>               | 25       | 7.722 | 0.107 | 193.038 | -0.026 | 7.541 | 7.635                  | 7.713  | 7.820                  | 7.910 |
| <b>GAX</b>                | 71       | 7.768 | 0.093 | 551.507 | -0.241 | 7.556 | 7.683                  | 7.763  | 7.840                  | 7.940 |
| <b>G<sup>U</sup>AX</b>    | 4        | 7.727 | 0.157 | 30.91   | 0.068  | 7.591 | 7.592                  | 7.717  | 7.862                  | 7.884 |
| <b>CAX</b>                | 37       | 8.023 | 0.078 | 296.862 | -0.510 | 7.840 | 7.971                  | 8.046  | 8.075                  | 8.154 |
| <b>UAX</b>                | 16       | 8.129 | 0.071 | 130.064 | -0.547 | 7.995 | 8.082                  | 8.140  | 8.175                  | 8.240 |
| <b>U<sup>G</sup>AX</b>    | 2        | 8.285 | 0.008 | 16.57   | --     | 8.279 | 8.279                  | 8.285  | 8.290                  | 8.290 |
| <b>5'AX</b>               | 2        | 8.327 | 0.104 | 16.653  | --     | 8.253 | 8.253                  | 8.327  | 8.400                  | 8.400 |
| <b>H6 chemical shifts</b> |          |       |       |         |        |       |                        |        |                        |       |
| <b>ACX</b>                | 45       | 7.462 | 0.071 | 335.808 | -0.094 | 7.329 | 7.414                  | 7.467  | 7.513                  | 7.590 |
| <b>G<sup>C</sup>CX</b>    | 84       | 7.638 | 0.086 | 641.556 | -0.422 | 7.370 | 7.580                  | 7.643  | 7.700                  | 7.810 |
| <b>G<sup>C</sup>CA</b>    | 13       | 7.657 | 0.059 | 99.54   | -0.331 | 7.552 | 7.630                  | 7.655  | 7.688                  | 7.746 |
| <b>G<sup>C</sup>CG</b>    | 17       | 7.565 | 0.095 | 128.60  | -0.226 | 7.370 | 7.500                  | 7.580  | 7.630                  | 7.720 |
| <b>G<sup>C</sup>CC</b>    | 42       | 7.639 | 0.068 | 320.85  | -0.163 | 7.480 | 7.580                  | 7.640  | 7.689                  | 7.760 |
| <b>G<sup>C</sup>CU</b>    | 12       | 7.714 | 0.085 | 92.57   | -0.934 | 7.551 | 7.683                  | 7.733  | 7.775                  | 7.810 |
| <b>G<sup>U</sup>CX</b>    | 9        | 7.662 | 0.068 | 68.96   | -0.574 | 7.533 | 7.640                  | 7.664  | 7.710                  | 7.760 |
| <b>CCX</b>                | 56       | 7.772 | 0.059 | 435.240 | -0.903 | 7.570 | 7.735                  | 7.780  | 7.810                  | 7.880 |
| <b>UCX</b>                | 65       | 7.878 | 0.054 | 512.069 | -0.401 | 7.711 | 7.850                  | 7.882  | 7.911                  | 8.010 |
| <b>U<sup>G</sup>CX</b>    | 5        | 7.968 | 0.031 | 39.84   | -0.437 | 7.930 | 7.940                  | 7.980  | 7.990                  | 8.000 |
| <b>3'CC</b>               | 66       | 7.652 | 0.056 | 505.052 | -0.824 | 7.490 | 7.626                  | 7.658  | 7.692                  | 7.754 |
| <b>5'CX</b>               | 16       | 8.101 | 0.091 | 129.612 | -1.315 | 7.869 | 8.070                  | 8.128  | 8.173                  | 8.194 |

|                            | <i>N</i> | Mean  | Std   | Sum     | Skew   | Min   | 25 <sup>th</sup> Perc. | Median | 75 <sup>th</sup> Perc. | Max   |
|----------------------------|----------|-------|-------|---------|--------|-------|------------------------|--------|------------------------|-------|
| AUX                        | 26       | 7.578 | 0.075 | 197.029 | -0.270 | 7.438 | 7.536                  | 7.571  | 7.639                  | 7.722 |
| GUX                        | 54       | 7.761 | 0.098 | 419.108 | -0.531 | 7.474 | 7.713                  | 7.775  | 7.820                  | 7.957 |
| G <sup>U</sup> UX          | 3        | 7.668 | 0.038 | 23.01   | -1.732 | 7.625 | 7.625                  | 7.690  | 7.690                  | 7.690 |
| CUX                        | 49       | 7.897 | 0.079 | 386.934 | -0.700 | 7.606 | 7.865                  | 7.900  | 7.951                  | 8.130 |
| UUX                        | 29       | 7.979 | 0.056 | 231.388 | -1.192 | 7.815 | 7.954                  | 7.990  | 8.015                  | 8.080 |
| U <sup>G</sup> UX          | 4        | 8.065 | 0.023 | 32.26   | -0.079 | 8.040 | 8.045                  | 8.066  | 8.085                  | 8.088 |
| 5'UX                       | 2        | 8.085 | 0.007 | 16.170  | --     | 8.080 | 8.080                  | 8.085  | 8.090                  | 8.090 |
| AU <sup>G</sup> X          | 4        | 7.571 | 0.121 | 30.28   | 0.0429 | 7.460 | 7.467                  | 7.567  | 7.675                  | 7.690 |
| GU <sup>G</sup> X          | 15       | 7.699 | 0.084 | 115.48  | 0.959  | 7.600 | 7.626                  | 7.700  | 7.730                  | 7.890 |
| CU <sup>G</sup> X          | 5        | 7.763 | 0.133 | 38.81   | 0.220  | 7.590 | 7.700                  | 7.766  | 7.808                  | 7.950 |
| UU <sup>G</sup> X          | 4        | 7.951 | 0.052 | 31.80   | 1.652  | 7.910 | 7.918                  | 7.933  | 7.984                  | 8.026 |
| <b>H5 chemical shifts</b>  |          |       |       |         |        |       |                        |        |                        |       |
| ACX                        | 45       | 5.189 | 0.062 | 233.482 | -1.180 | 4.973 | 5.160                  | 5.185  | 5.222                  | 5.307 |
| G <sup>C</sup> CX          | 83       | 5.223 | 0.080 | 433.533 | 0.062  | 5.010 | 5.174                  | 5.220  | 5.276                  | 5.460 |
| G <sup>C</sup> CA          | 13       | 5.226 | 0.064 | 67.94   | 0.350  | 5.131 | 5.180                  | 5.210  | 5.276                  | 5.341 |
| G <sup>C</sup> CG          | 16       | 5.197 | 0.087 | 83.14   | -0.525 | 5.010 | 5.157                  | 5.200  | 5.246                  | 5.320 |
| G <sup>C</sup> CC          | 42       | 5.223 | 0.085 | 219.35  | 0.474  | 5.010 | 5.160                  | 5.225  | 5.262                  | 5.460 |
| G <sup>C</sup> CU          | 12       | 5.259 | 0.059 | 63.10   | -0.011 | 5.180 | 5.207                  | 5.257  | 5.309                  | 5.360 |
| G <sup>U</sup> CX          | 9        | 5.362 | 0.084 | 48.26   | 0.221  | 5.263 | 5.290                  | 5.350  | 5.430                  | 5.475 |
| CCX                        | 56       | 5.500 | 0.091 | 307.975 | -0.153 | 5.240 | 5.450                  | 5.498  | 5.553                  | 5.730 |
| UCX                        | 66       | 5.650 | 0.065 | 372.931 | 0.004  | 5.478 | 5.599                  | 5.662  | 5.694                  | 5.857 |
| U <sup>G</sup> CX          | 5        | 5.685 | 0.032 | 28.43   | 0.000  | 5.640 | 5.680                  | 5.685  | 5.690                  | 5.730 |
| 3'CC                       | 66       | 5.476 | 0.086 | 361.395 | -0.661 | 5.220 | 5.437                  | 5.481  | 5.530                  | 5.710 |
| 5'CX                       | 16       | 5.972 | 0.116 | 95.545  | -1.974 | 5.642 | 5.972                  | 5.990  | 6.033                  | 6.090 |
| AUX                        | 26       | 5.042 | 0.099 | 131.083 | 2.586  | 4.893 | 4.991                  | 5.033  | 5.073                  | 5.440 |
| GUX                        | 56       | 5.088 | 0.083 | 284.937 | -0.483 | 4.858 | 5.033                  | 5.098  | 5.150                  | 5.272 |
| G <sup>U</sup> UX          | 3        | 5.216 | 0.067 | 15.65   | 1.008  | 5.158 | 5.158                  | 5.200  | 5.290                  | 5.290 |
| CUX                        | 49       | 5.442 | 0.118 | 266.667 | 0.757  | 5.153 | 5.401                  | 5.430  | 5.470                  | 5.824 |
| UUX                        | 30       | 5.568 | 0.071 | 167.033 | -1.706 | 5.345 | 5.545                  | 5.564  | 5.620                  | 5.681 |
| U <sup>G</sup> UX          | 4        | 5.610 | 0.035 | 22.44   | 0.275  | 5.570 | 5.585                  | 5.609  | 5.636                  | 5.654 |
| 5'UX                       | 2        | 5.825 | 0.007 | 11.650  | --     | 5.820 | 5.820                  | 5.825  | 5.830                  | 5.830 |
| AU <sup>G</sup> X          | 4        | 5.376 | 0.056 | 21.50   | 0.634  | 5.314 | 5.342                  | 5.370  | 5.410                  | 5.450 |
| GU <sup>G</sup> X          | 14       | 5.372 | 0.109 | 75.20   | -1.888 | 5.070 | 5.350                  | 5.407  | 5.430                  | 5.480 |
| CU <sup>G</sup> X          | 5        | 5.702 | 0.086 | 28.51   | 0.453  | 5.610 | 5.630                  | 5.717  | 5.730                  | 5.825 |
| UU <sup>G</sup> X          | 4        | 5.785 | 0.069 | 23.14   | 0.857  | 5.714 | 5.737                  | 5.774  | 5.833                  | 5.877 |
| <b>H1' chemical shifts</b> |          |       |       |         |        |       |                        |        |                        |       |
| AGX                        | 50       | 5.574 | 0.094 | 278.678 | -0.880 | 5.270 | 5.528                  | 5.593  | 5.638                  | 5.750 |
| G <sup>G</sup> GX          | 63       | 5.750 | 0.054 | 362.270 | -0.632 | 5.580 | 5.720                  | 5.750  | 5.790                  | 5.855 |
| G <sup>G</sup> GA          | 25       | 5.741 | 0.045 | 143.52  | 0.306  | 5.665 | 5.712                  | 5.737  | 5.765                  | 5.821 |
| G <sup>G</sup> GG          | 11       | 5.769 | 0.039 | 63.46   | 0.542  | 5.708 | 5.750                  | 5.754  | 5.800                  | 5.840 |

|                      | N  | Mean   | Std   | Sum     | Skew   | Min   | 25 <sup>th</sup> Perc. | Median | 75 <sup>th</sup> Perc. | Max   |
|----------------------|----|--------|-------|---------|--------|-------|------------------------|--------|------------------------|-------|
| GGC                  | 21 | 5.744  | 0.071 | 120.62  | -0.726 | 5.580 | 5.710                  | 5.740  | 5.803                  | 5.855 |
| GGU                  | 7  | 5.801  | 0.064 | 40.61   | 1.695  | 5.729 | 5.771                  | 5.786  | 5.810                  | 5.933 |
| G <sup>U</sup> GX    | 2  | 5.701  | 0.010 | 11.40   | --     | 5.630 | 5.630                  | 5.701  | 5.771                  | 5.771 |
| CGX                  | 41 | 5.700  | 0.070 | 233.698 | -0.920 | 5.523 | 5.665                  | 5.710  | 5.750                  | 5.807 |
| UGX                  | 32 | 5.763  | 0.061 | 184.408 | -1.581 | 5.530 | 5.741                  | 5.762  | 5.801                  | 5.868 |
| U <sup>G</sup> GX    | 5  | 5.753  | 0.054 | 28.77   | 1.303  | 5.700 | 5.730                  | 5.730  | 5.765                  | 5.840 |
| 5'GGX                | 67 | 5.907  | 0.050 | 395.763 | -1.343 | 5.720 | 5.881                  | 5.918  | 5.944                  | 6.000 |
| 5'GX                 | 87 | 5.808  | 0.079 | 505.281 | -0.384 | 5.618 | 5.77                   | 5.814  | 5.858                  | 5.979 |
| A <sup>U</sup> UX    | 6  | 5.601  | 0.096 | 33.61   | -0.360 | 5.483 | 5.490                  | 5.629  | 5.655                  | 5.720 |
| GG <sup>U</sup> UX   | 5  | 5.786  | 0.033 | 28.93   | 0.484  | 5.750 | 5.770                  | 5.772  | 5.810                  | 5.830 |
| CG <sup>U</sup> UX   | 9  | 5.7103 | 0.073 | 51.39   | -0.309 | 5.600 | 5.670                  | 5.730  | 5.750                  | 5.812 |
| UG <sup>U</sup> UX   | 4  | 5.771  | 0.028 | 23.08   | 0.727  | 5.740 | 5.753                  | 5.767  | 5.789                  | 5.808 |
| 5'GG <sup>U</sup> UX | 4  | 5.855  | 0.142 | 23.42   | -1.844 | 5.645 | 5.7695                 | 5.912  | 5.940                  | 5.950 |
| AAX                  | 26 | 5.865  | 0.071 | 152.501 | -0.040 | 5.715 | 5.810                  | 5.869  | 5.928                  | 6.020 |
| GAX                  | 72 | 5.946  | 0.070 | 428.090 | -0.847 | 5.685 | 5.909                  | 5.950  | 6.002                  | 6.081 |
| G <sup>U</sup> AX    | 4  | 5.908  | 0.029 | 23.63   | -1.711 | 5.865 | 5.890                  | 5.919  | 5.927                  | 5.930 |
| CAX                  | 38 | 5.896  | 0.065 | 224.060 | -0.814 | 5.730 | 5.860                  | 5.910  | 5.938                  | 6.008 |
| UAX                  | 17 | 5.975  | 0.069 | 101.575 | -0.465 | 5.842 | 5.950                  | 5.970  | 6.022                  | 6.090 |
| U <sup>G</sup> AX    | 2  | 5.940  | 0.001 | 11.88   | --     | 5.939 | 5.939                  | 5.940  | 5.940                  | 5.940 |
| 5'AX                 | 2  | 6.009  | 0.055 | 12.018  | --     | 5.970 | 5.970                  | 6.009  | 6.048                  | 6.048 |
| ACX                  | 44 | 5.372  | 0.068 | 236.384 | -1.578 | 5.137 | 5.360                  | 5.386  | 5.414                  | 5.461 |
| GCX                  | 83 | 5.526  | 0.087 | 458.644 | 1.013  | 5.340 | 5.476                  | 5.520  | 5.567                  | 5.820 |
| GCA                  | 13 | 5.486  | 0.039 | 71.31   | 0.993  | 5.434 | 5.460                  | 5.480  | 5.500                  | 5.571 |
| GCG                  | 17 | 5.515  | 0.095 | 93.75   | 1.178  | 5.340 | 5.479                  | 5.500  | 5.550                  | 5.790 |
| GCC                  | 41 | 5.535  | 0.101 | 226.94  | 0.879  | 5.340 | 5.470                  | 5.520  | 5.570                  | 5.820 |
| GCU                  | 12 | 5.554  | 0.039 | 66.64   | -1.067 | 5.465 | 5.532                  | 5.561  | 5.580                  | 5.600 |
| G <sup>U</sup> CX    | 9  | 5.5282 | 0.146 | 49.75   | 0.614  | 5.278 | 5.470                  | 5.515  | 5.540                  | 5.830 |
| CCX                  | 54 | 5.472  | 0.056 | 295.494 | -0.273 | 5.336 | 5.448                  | 5.470  | 5.509                  | 5.580 |
| UCX                  | 62 | 5.565  | 0.072 | 345.041 | 0.843  | 5.439 | 5.522                  | 5.570  | 5.606                  | 5.850 |
| U <sup>G</sup> CX    | 5  | 5.619  | 0.093 | 28.10   | -0.586 | 5.506 | 5.530                  | 5.670  | 5.690                  | 5.700 |
| 3'CC                 | 64 | 5.726  | 0.068 | 366.479 | -1.179 | 5.520 | 5.690                  | 5.743  | 5.779                  | 5.830 |
| 5'CX                 | 16 | 5.540  | 0.101 | 88.643  | -1.681 | 5.231 | 5.522                  | 5.543  | 5.583                  | 5.720 |
| AUX                  | 26 | 5.464  | 0.071 | 142.053 | -1.346 | 5.265 | 5.432                  | 5.484  | 5.508                  | 5.563 |
| GUX                  | 54 | 5.561  | 0.094 | 300.319 | 0.619  | 5.315 | 5.522                  | 5.567  | 5.618                  | 5.955 |
| G <sup>U</sup> UX    | 3  | 5.502  | 0.088 | 16.51   | 0.086  | 5.415 | 5.415                  | 5.500  | 5.590                  | 5.590 |
| CUX                  | 49 | 5.534  | 0.094 | 271.165 | 0.759  | 5.320 | 5.490                  | 5.538  | 5.580                  | 5.920 |
| UUX                  | 30 | 5.617  | 0.066 | 168.516 | -0.789 | 5.451 | 5.581                  | 5.622  | 5.677                  | 5.709 |
| U <sup>G</sup> UX    | 4  | 5.634  | 0.016 | 22.54   | -1.931 | 5.610 | 5.625                  | 5.641  | 5.643                  | 5.644 |
| 5'UX                 | 2  | 5.560  | 0.028 | 11.120  | --     | 5.540 | 5.540                  | 5.560  | 5.580                  | 5.580 |
| AU <sup>G</sup> X    | 4  | 5.308  | 0.069 | 21.23   | -0.513 | 5.221 | 5.256                  | 5.315  | 5.360                  | 5.380 |
| GU <sup>G</sup> X    | 15 | 5.501  | 0.094 | 82.51   | -1.234 | 5.250 | 5.475                  | 5.495  | 5.550                  | 5.640 |

|                                 | <i>N</i> | Mean    | Std    | Sum      | Skew   | Min     | 25 <sup>th</sup> Perc. | Median  | 75 <sup>th</sup> Perc. | Max     |
|---------------------------------|----------|---------|--------|----------|--------|---------|------------------------|---------|------------------------|---------|
| <b>CU<sup>G</sup>X</b>          | 5        | 5.629   | 0.099  | 28.15    | -0.146 | 5.500   | 5.580                  | 5.610   | 5.721                  | 5.734   |
| <b>UU<sup>G</sup>X</b>          | 4        | 5.570   | 0.157  | 22.28    | 1.243  | 5.419   | 5.476                  | 5.535   | 5.664                  | 5.790   |
| <b>H2 chemical shifts (ppm)</b> |          |         |        |          |        |         |                        |         |                        |         |
| <b>AAA</b>                      | 3        | 7.205   | 0.083  | 21.616   | -0.307 | 7.120   | 7.12                   | 7.211   | 7.285                  | 7.285   |
| <b>AAG</b>                      | 9        | 7.402   | 0.056  | 66.617   | 0.617  | 7.330   | 7.367                  | 7.399   | 7.414                  | 7.490   |
| <b>AAC</b>                      | 11       | 7.740   | 0.113  | 85.140   | -1.275 | 7.510   | 7.688                  | 7.787   | 7.806                  | 7.874   |
| <b>AAU</b>                      | 3        | 7.782   | 0.011  | 23.346   | -0.423 | 7.771   | 7.771                  | 7.783   | 7.792                  | 7.792   |
| <b>GAA</b>                      | 21       | 7.094   | 0.087  | 148.975  | -1.784 | 6.830   | 7.067                  | 7.100   | 7.147                  | 7.205   |
| <b>GAG</b>                      | 22       | 7.479   | 0.046  | 164.527  | -1.215 | 7.351   | 7.465                  | 7.486   | 7.504                  | 7.546   |
| <b>GAC</b>                      | 22       | 7.802   | 0.049  | 171.652  | -0.529 | 7.700   | 7.760                  | 7.813   | 7.838                  | 7.875   |
| <b>GAU</b>                      | 8        | 7.753   | 0.083  | 62.021   | -0.638 | 7.626   | 7.686                  | 7.771   | 7.818                  | 7.846   |
| <b>CAA</b>                      | 3        | 6.732   | 0.038  | 20.195   | -1.042 | 6.690   | 6.690                  | 6.741   | 6.764                  | 6.764   |
| <b>CAG</b>                      | 11       | 6.999   | 0.067  | 76.986   | 0.419  | 6.890   | 6.946                  | 7.010   | 7.030                  | 7.138   |
| <b>CAC</b>                      | 13       | 7.395   | 0.095  | 96.134   | -0.933 | 7.209   | 7.367                  | 7.420   | 7.455                  | 7.520   |
| <b>CAU</b>                      | 11       | 7.270   | 0.065  | 79.970   | -0.602 | 7.140   | 7.224                  | 7.270   | 7.317                  | 7.360   |
| <b>UAA</b>                      | 3        | 6.463   | 0.055  | 19.390   | -1.668 | 6.400   | 6.400                  | 6.490   | 6.500                  | 6.500   |
| <b>UAG</b>                      | 4        | 6.800   | 0.082  | 27.200   | -0.200 | 6.710   | 6.730                  | 6.810   | 6.870                  | 6.870   |
| <b>UAC</b>                      | 6        | 7.089   | 0.071  | 42.534   | -0.183 | 6.984   | 7.041                  | 7.092   | 7.140                  | 7.186   |
| <b>UAU</b>                      | 3        | 7.009   | 0.122  | 21.026   | 0.062  | 6.888   | 6.888                  | 7.007   | 7.131                  | 7.131   |
| <b>C8 chemical shifts</b>       |          |         |        |          |        |         |                        |         |                        |         |
| <b>AGX</b>                      | 22       | 135.861 | 0.372  | 2988.946 | 1.398  | 135.40  | 135.647                | 135.724 | 136.00                 | 136.76  |
| <b>GGX</b>                      | 30       | 136.297 | 0.262  | 4088.924 | 0.670  | 135.94  | 136.10                 | 136.256 | 136.45                 | 136.926 |
| <b>CGX</b>                      | 15       | 136.227 | 0.280  | 2043.412 | 0.896  | 135.80  | 136.012                | 136.20  | 136.40                 | 136.853 |
| <b>UGX</b>                      | 19       | 136.359 | 0.149  | 2590.828 | 0.059  | 136.00  | 136.30                 | 136.322 | 136.40                 | 136.70  |
| <b>5'GGX</b>                    | 31       | 136.986 | 0.207  | 4246.552 | 1.119  | 136.64  | 136.816                | 136.975 | 137.084                | 137.60  |
| <b>5'GX</b>                     | 36       | 139.151 | 0.193  | 5009.440 | -0.564 | 138.70  | 139.023                | 139.193 | 139.30                 | 139.438 |
| <b>AAX</b>                      | 8        | 139.138 | 0.357  | 1113.106 | 2.575  | 138.90  | 138.98                 | 139.00  | 139.123                | 140.00  |
| <b>GAX</b>                      | 29       | 139.534 | 0.474  | 4046.493 | 2.501  | 138.903 | 139.33                 | 139.434 | 139.60                 | 141.40  |
| <b>CAX</b>                      | 17       | 139.586 | 0.135  | 2372.962 | 0.069  | 139.40  | 139.50                 | 139.60  | 139.70                 | 139.824 |
| <b>UAX</b>                      | 4        | 139.760 | 0.273  | 559.040  | 0.210  | 139.44  | 139.57                 | 139.75  | 139.95                 | 140.10  |
| <b>C6 chemical shifts (ppm)</b> |          |         |        |          |        |         |                        |         |                        |         |
| <b>ACX</b>                      | 13       | 140.646 | 0.452  | 1828.401 | 0.288  | 139.98  | 140.20                 | 140.579 | 140.979                | 141.524 |
| <b>GCX</b>                      | 34       | 141.081 | 0.491  | 4796.745 | 0.073  | 140.10  | 140.841                | 141.033 | 141.346                | 142.02  |
| <b>CCX</b>                      | 30       | 141.482 | 0.363  | 4244.465 | 1.024  | 140.799 | 141.36                 | 141.50  | 141.6                  | 142.772 |
| <b>UCX</b>                      | 22       | 141.872 | 0.442  | 3121.175 | 1.694  | 141.20  | 141.704                | 141.826 | 142.031                | 143.379 |
| <b>3'CC</b>                     | 30       | 141.817 | 0.266  | 4254.496 | -1.293 | 140.90  | 141.70                 | 141.857 | 141.972                | 142.3   |
| <b>5'CX</b>                     | 4        | 143.215 | 0.535  | 572.860  | 1.741  | 142.80  | 142.905                | 143.03  | 143.525                | 144.00  |
| <b>AUX</b>                      | 11       | 141.374 | 0.4729 | 1555.112 | 0.542  | 140.80  | 140.93                 | 141.50  | 141.60                 | 142.323 |
| <b>GUX</b>                      | 20       | 141.759 | 0.481  | 2835.188 | 0.513  | 141.10  | 141.42                 | 141.75  | 142.00                 | 142.705 |
| <b>CUX</b>                      | 17       | 142.050 | 0.320  | 2414.850 | -0.162 | 141.50  | 141.994                | 142.08  | 142.195                | 142.612 |
| <b>UUX</b>                      | 13       | 142.402 | 0.254  | 1851.227 | -0.298 | 142.00  | 142.30                 | 142.40  | 142.60                 | 142.788 |



|                                  | <i>N</i> | Mean    | Std   | Sum      | Skew   | Min     | 25 <sup>th</sup> Perc. | Median  | 75 <sup>th</sup> Perc. | Max     |
|----------------------------------|----------|---------|-------|----------|--------|---------|------------------------|---------|------------------------|---------|
| <b>C5 chemical shifts (ppm)</b>  |          |         |       |          |        |         |                        |         |                        |         |
| <b>ACX</b>                       | 12       | 97.347  | 0.337 | 1168.161 | -0.576 | 96.60   | 97.169                 | 97.345  | 97.58                  | 97.9    |
| <b>G<u>C</u>X</b>                | 32       | 97.232  | 0.256 | 3111.428 | 0.301  | 96.80   | 97.047                 | 97.20   | 97.434                 | 97.822  |
| <b>C<u>C</u>X</b>                | 22       | 97.687  | 0.361 | 2149.111 | 0.946  | 97.14   | 97.41                  | 97.67   | 97.88                  | 98.681  |
| <b>U<u>C</u>X</b>                | 31       | 97.641  | 0.331 | 3026.875 | 0.402  | 97.037  | 97.39                  | 97.59   | 97.91                  | 98.4    |
| <b>3'<u>C</u>C</b>               | 25       | 98.155  | 0.287 | 2453.886 | -0.222 | 97.51   | 97.953                 | 98.197  | 98.311                 | 98.701  |
| <b>5'<u>C</u>X</b>               | 4        | 98.798  | 0.134 | 395.190  | -1.765 | 98.60   | 98.72                  | 98.845  | 98.875                 | 98.9    |
| <b>A<u>U</u>X</b>                | 9        | 102.885 | 0.273 | 925.962  | -0.073 | 102.50  | 102.622                | 102.90  | 103.182                | 103.2   |
| <b>G<u>U</u>X</b>                | 20       | 102.856 | 0.308 | 2057.117 | 0.340  | 102.30  | 102.618                | 102.792 | 103.10                 | 103.4   |
| <b>C<u>U</u>X</b>                | 19       | 103.389 | 0.214 | 1964.384 | 0.087  | 103.00  | 103.292                | 103.381 | 103.526                | 103.82  |
| <b>U<u>U</u>X</b>                | 15       | 103.274 | 0.345 | 1549.105 | 0.103  | 102.70  | 102.948                | 103.286 | 103.463                | 103.9   |
| <b>C1' chemical shifts (ppm)</b> |          |         |       |          |        |         |                        |         |                        |         |
| <b>A<u>G</u>X</b>                | 14       | 92.731  | 0.302 | 1298.237 | 0.699  | 92.30   | 92.59                  | 92.60   | 93.00                  | 93.304  |
| <b>G<u>G</u>X</b>                | 18       | 93.077  | 0.266 | 1675.378 | 0.594  | 92.713  | 92.87                  | 93.011  | 93.21                  | 93.60   |
| <b>C<u>G</u>X</b>                | 11       | 93.045  | 0.243 | 1023.493 | 0.377  | 92.71   | 92.92                  | 93.00   | 93.23                  | 93.50   |
| <b>U<u>G</u>X</b>                | 16       | 92.678  | 0.327 | 1482.848 | -0.148 | 91.957  | 92.470                 | 92.713  | 92.895                 | 93.35   |
| <b>5'<u>G</u>G<u>X</u></b>       | 25       | 92.925  | 0.341 | 2323.137 | -2.413 | 91.599  | 92.82                  | 92.991  | 93.12                  | 93.51   |
| <b>5'<u>G</u>X</b>               | 31       | 91.718  | 0.699 | 2843.245 | -0.085 | 90.224  | 91.21                  | 91.685  | 92.31                  | 93.023  |
| <b>A<u>A</u>X</b>                | 7        | 92.688  | 0.206 | 648.817  | -0.816 | 92.40   | 92.411                 | 92.81   | 92.851                 | 92.87   |
| <b>G<u>A</u>X</b>                | 32       | 93.075  | 0.167 | 2978.412 | -0.808 | 92.70   | 92.98                  | 93.098  | 93.207                 | 93.3    |
| <b>C<u>A</u>X</b>                | 16       | 93.060  | 0.128 | 1488.957 | 0.126  | 92.90   | 92.928                 | 93.10   | 93.147                 | 93.28   |
| <b>U<u>A</u>X</b>                | 5        | 92.832  | 0.186 | 464.160  | 0.414  | 92.66   | 92.67                  | 92.77   | 93.01                  | 93.05   |
| <b>A<u>C</u>X</b>                | 16       | 93.895  | 0.388 | 1502.321 | 1.185  | 93.32   | 93.613                 | 93.925  | 94.10                  | 94.959  |
| <b>G<u>C</u>X</b>                | 28       | 93.998  | 0.244 | 2631.955 | -0.158 | 93.50   | 93.814                 | 94.00   | 94.198                 | 94.48   |
| <b>C<u>C</u>X</b>                | 13       | 94.213  | 0.173 | 1224.763 | -0.344 | 93.847  | 94.105                 | 94.20   | 94.342                 | 94.509  |
| <b>U<u>C</u>X</b>                | 22       | 94.126  | 0.210 | 2070.762 | 0.580  | 93.796  | 94.00                  | 94.085  | 94.30                  | 94.544  |
| <b>3'<u>C</u>C</b>               | 23       | 92.962  | 0.146 | 2138.128 | 0.271  | 92.713  | 92.86                  | 92.942  | 93.10                  | 93.24   |
| <b>A<u>U</u>X</b>                | 9        | 93.181  | 0.214 | 838.626  | 1.012  | 92.99   | 93.03                  | 93.09   | 93.34                  | 93.577  |
| <b>G<u>U</u>X</b>                | 20       | 93.867  | 0.278 | 1877.343 | 0.696  | 93.52   | 93.630                 | 93.775  | 94.091                 | 94.50   |
| <b>C<u>U</u>X</b>                | 17       | 93.828  | 0.206 | 1595.078 | 0.275  | 93.50   | 93.70                  | 93.83   | 93.986                 | 94.239  |
| <b>U<u>U</u>X</b>                | 13       | 93.588  | 0.372 | 1216.641 | -1.990 | 92.582  | 93.565                 | 93.739  | 93.77                  | 93.968  |
| <b>C2 chemical shifts (ppm)</b>  |          |         |       |          |        |         |                        |         |                        |         |
| <b>A<u>A</u>A</b>                | 1        | 152.895 | --    | 152.895  | --     | 152.895 | 152.895                | 152.895 | 152.895                | 152.895 |
| <b>A<u>A</u>G</b>                | 4        | 153.032 | 0.046 | 612.126  | 1.833  | 153.00  | 153.004                | 153.013 | 153.060                | 153.10  |
| <b>A<u>A</u>C</b>                | 3        | 153.813 | 0.186 | 461.440  | -1.642 | 153.60  | 153.60                 | 153.90  | 153.94                 | 153.94  |
| <b>A<u>A</u>U</b>                | 3        | 153.867 | 0.058 | 461.600  | -1.732 | 153.80  | 153.80                 | 153.90  | 153.90                 | 153.90  |
| <b>G<u>A</u>A</b>                | 9        | 152.879 | 0.169 | 1375.910 | -1.522 | 152.50  | 152.812                | 152.934 | 153.00                 | 153.037 |
| <b>G<u>A</u>G</b>                | 9        | 153.428 | 0.110 | 1380.849 | -0.154 | 153.293 | 153.30                 | 153.454 | 153.53                 | 153.556 |
| <b>G<u>A</u>C</b>                | 10       | 154.196 | 0.159 | 1541.959 | -1.008 | 153.877 | 154.10                 | 154.246 | 154.30                 | 154.40  |
| <b>G<u>A</u>U</b>                | 7        | 153.947 | 0.345 | 1077.631 | 2.063  | 153.70  | 153.70                 | 153.90  | 154.00                 | 154.686 |

|     | <i>N</i> | Mean    | Std   | Sum      | Skew   | Min     | 25 <sup>th</sup> Perc. | Median  | 75 <sup>th</sup> Perc. | Max    |
|-----|----------|---------|-------|----------|--------|---------|------------------------|---------|------------------------|--------|
| CAA | 2        | 152.250 | 0.212 | 304.5000 | --     | 152.10  | 152.10                 | 152.25  | 152.40                 | 152.40 |
| CAG | 4        | 152.428 | 0.101 | 609.713  | -0.592 | 152.30  | 152.35                 | 152.442 | 152.507                | 152.53 |
| CAC | 5        | 153.406 | 0.147 | 767.029  | -2.089 | 153.147 | 153.437                | 153.46  | 153.485                | 153.50 |
| CAU | 8        | 153.131 | 0.080 | 1225.050 | -0.022 | 153.00  | 153.10                 | 153.10  | 153.20                 | 153.25 |
| UAA | 1        | 152.300 | --    | 152.300  | --     | 152.30  | 152.30                 | 152.30  | 152.30                 | 152.30 |
| UAG | 0        | --      | --    | --       | --     | --      | --                     | --      | --                     | --     |
| UAC | 4        | 153.308 | 0.137 | 613.230  | 1.250  | 153.18  | 153.215                | 153.275 | 153.40                 | 153.50 |
| UAU | 0        | --      | --    | --       | --     | --      | --                     | --      | --                     | --     |

**Table S3.** Statistics of the intraresidual H8-C8 2D chemical shifts correlations of Figure 2.

| H8-C8 chemical shift correlations |         |        |         |        |         |        |          |        |         |        |         |        |
|-----------------------------------|---------|--------|---------|--------|---------|--------|----------|--------|---------|--------|---------|--------|
|                                   | AAX     |        | CAX     |        | GAX     |        | UAX      |        |         |        |         |        |
|                                   | H8      | C8     | H8      | C8     | H8      | C8     | H8       | C8     |         |        |         |        |
| Mean                              | 7.6886  | 139.14 | 8.0153  | 139.59 | 7.7626  | 139.53 | 8.167    | 139.76 |         |        |         |        |
| Std                               | 0.1260  | 0.3565 | 0.0659  | 0.1350 | 0.0957  | 0.4739 | 0.0786   | 0.2728 |         |        |         |        |
| Corr                              | 0.49428 |        | 0.5142  |        | 0.68402 |        | 0.46485  |        |         |        |         |        |
| N                                 | 8       |        | 17      |        | 29      |        | 4        |        |         |        |         |        |
|                                   | AGX     |        | CGX     |        | GGX     |        | UGX      |        | 5'GGX   |        | 5'GX    |        |
|                                   | H8      | C8     | H8      | C8     | H8      | C8     | H8       | C8     | H8      | C8     | H8      | C8     |
| Mean                              | 7.1566  | 135.86 | 7.5684  | 136.23 | 7.2099  | 136.30 | 7.6776   | 136.36 | 7.5737  | 136.99 | 8.1313  | 139.15 |
| Std                               | 0.1343  | 0.3720 | 0.0833  | 0.2797 | 0.0863  | 0.2621 | 0.0530   | 0.1487 | 0.0731  | 0.2071 | 0.0450  | 0.1931 |
| Corr                              | 0.3456  |        | 0.88163 |        | 0.33701 |        | -0.02944 |        | 0.29544 |        | 0.29131 |        |
| N                                 | 22      |        | 15      |        | 30      |        | 19       |        | 31      |        | 36      |        |

**Table S4.** Statistics of the intraresidual H5-H6 2D chemical shifts correlations of Figure 2.

| H5-H6 chemical shift correlations |         |        |         |        |         |        |         |        |         |        |         |        |
|-----------------------------------|---------|--------|---------|--------|---------|--------|---------|--------|---------|--------|---------|--------|
|                                   | ACX     |        | CCX     |        | GCX     |        | UCX     |        | 3'CC    |        | 5'CX    |        |
|                                   | H5      | H6     |
| Mean                              | 5.1934  | 7.4603 | 5.4996  | 7.7721 | 5.2233  | 7.6383 | 5.6510  | 7.8778 | 5.4759  | 7.6507 | 5.9716  | 8.1008 |
| Std                               | 0.0529  | 0.0701 | 0.0905  | 0.0586 | 0.0799  | 0.0868 | 0.0656  | 0.0545 | 0.0866  | 0.0549 | 0.1162  | 0.0915 |
| Corr                              | 0.20926 |        | 0.25932 |        | 0.5595  |        | 0.63389 |        | 0.58006 |        | 0.34914 |        |
| N                                 | 44      |        | 56      |        | 83      |        | 65      |        | 65      |        | 16      |        |
|                                   | AUX     |        | CUX     |        | GUX     |        | UUX     |        | 5'UX    |        |         |        |
|                                   | H5      | H6     |         |        |
| Mean                              | 5.0417  | 7.5780 | 5.4422  | 7.8966 | 5.0888  | 7.7613 | 5.5747  | 7.9789 | 5.825   | 8.085  |         |        |
| Std                               | 0.0991  | 0.0751 | 0.1176  | 0.0786 | 0.0749  | 0.0978 | 0.0606  | 0.0562 | 0.0071  | 0.0071 |         |        |
| Corr                              | 0.36128 |        | 0.46968 |        | 0.69167 |        | 0.53948 |        | NA      |        |         |        |
| N                                 | 26      |        | 49      |        | 54      |        | 29      |        | 2       |        |         |        |

**Table S5.** Input peak lists for automatic resonance assignment with FLYA

| Spectrum                             | Expected peaks <sup>a</sup> | Measured peaks <sup>b</sup> | Assigned <sup>c</sup> | Complete <sup>d</sup> |
|--------------------------------------|-----------------------------|-----------------------------|-----------------------|-----------------------|
| <b>FZL4:</b>                         |                             |                             |                       |                       |
| NOESY                                | 560                         | 270                         | 74.1%                 | 42.7%                 |
| TOCSY                                | 18                          | 18                          | 100.0%                | 100.0%                |
| <sup>1</sup> H- <sup>13</sup> C HSQC | 56                          | 60                          | 88.3%                 | 98.2%                 |
| <b>TASL1:</b>                        |                             |                             |                       |                       |
| NOESY                                | 657                         | 431                         | 61.3%                 | 51.6%                 |
| TOCSY                                | 24                          | 24                          | 100.0%                | 100.0%                |
| <sup>1</sup> H- <sup>13</sup> C HSQC | 61                          | 60                          | 98.3%                 | 100.0%                |
| <b>SL23:</b>                         |                             |                             |                       |                       |
| NOESY                                | 600                         | 297                         | 69.7%                 | 50.0%                 |
| TOCSY                                | 28                          | 28                          | 100.0%                | 100.0%                |
| <sup>1</sup> H- <sup>13</sup> C HSQC | 62                          | 59                          | 91.5%                 | 100.0%                |
| <b>FZL2:</b>                         |                             |                             |                       |                       |
| NOESY                                | 500                         | 215                         | 76.7%                 | 47.4%                 |
| TOCSY                                | 18                          | 18                          | 100.0%                | 100.0%                |
| <sup>1</sup> H- <sup>13</sup> C HSQC | 58                          | 55                          | 96.4%                 | 98.3%                 |
| <b>ELAVL1 siRNA:</b>                 |                             |                             |                       |                       |
| NOESY                                | 1419                        | 616                         | 82.1%                 | 57.9%                 |
| TOCSY                                | 46                          | 45                          | 100.0%                | 100.0%                |
| <sup>1</sup> H- <sup>13</sup> C HSQC | 121                         | 109                         | 93.6%                 | 98.4%                 |

<sup>a</sup> Expected peaks: Number of peaks expected by FLYA for H2, H5, H6, H8, H1', and their corresponding carbon resonances based on magnetization transfer rules for TOCSY and <sup>1</sup>H-<sup>13</sup>C HSQC, or, for the NOESY spectrum, consistently short distances in a bundle of randomized conformers (see Methods). Only the uracil H5-H6 correlations were considered for the TOCSY spectrum.

<sup>b</sup> Measured peaks: Number of peaks picked in the measured spectrum.

<sup>c</sup> Assigned: Percentage of measured peaks that were assigned by FLYA. The theoretical maximum of 100% corresponds to having all measured peaks assigned. Note that several expected peaks can be mapped to the same measured peak, i.e. assignments of measured peaks can be unambiguous or ambiguous. Remaining unassigned measured peaks are likely to be artifacts.

<sup>d</sup> Complete: Percentage of expected peaks that FLYA mapped to a measured peak. The theoretical maximum of 100% corresponds to the situation that the measured peak list contains all expected peaks. Each expected peak can be mapped to at most one measured peak. Remaining expected peaks correspond to missing peaks in the measured peak list.

**Table S6.** FLYA chemical shift assignments for FZL4

For each assigned atom the table contains the following information: ‘Ref’, manually determined reference chemical shift (ppm). ‘Shift’, consolidated chemical shift determined by FLYA (ppm). ‘Dev’, deviation between the consolidated chemical shift determined by FLYA and the reference chemical shift (ppm). ‘Extent’, number of individual runs of the FLYA algorithm in which the atom was assigned. ‘inside’, percentage of the chemical shift values from the individual FLYA runs that deviate by less than the tolerance of 0.02 ppm for <sup>1</sup>H and 0.3 ppm for <sup>13</sup>C from the consolidated chemical shift value. Assignments for which this percentage is at least 80% are labelled as ‘strong’. ‘inref’, percentage of the chemical shift values from the individual FLYA runs that agree with the reference chemical shift value within the tolerance. Atoms for which the consolidated and reference chemical shifts agree within the tolerance are labelled with ‘=’ (green). Disagreement between the two shifts is indicated by ‘!’ (magenta). For erroneous consolidated shifts the sequentially closest atom with a reference chemical shift within the tolerance is indicated in parenthesis if it is located in the same residue (no residue number given) or in the immediately preceding or following residue (residue number given). Atoms for which our chemical shift statistics could be used are highlighted in cyan.

| Atom | Residue | Ref | Shift   | Dev     | Extent | inside | inref |         | H6      | RCYT    | 13 | 7.724   | 7.724   | 0.000  | 50.0 | 100.0 | 100.0 | strong=         |
|------|---------|-----|---------|---------|--------|--------|-------|---------|---------|---------|----|---------|---------|--------|------|-------|-------|-----------------|
| C1'  | RGUA    | 1   | 91.579  | 91.579  | 0.000  | 50.0   | 100.0 | strong= | C1'     | RGUA    | 14 | 91.893  | 92.446  | -0.553 | 50.0 | 42.0  | 2.0   | !               |
| H1'  | RGUA    | 1   | 5.791   | 5.793   | -0.002 | 50.0   | 100.0 | strong= | H1'     | RGUA    | 14 | 5.392   | 5.672   | -0.280 | 50.0 | 73.9  | 2.0   | !               |
| C8   | RGUA    | 1   | 139.129 | 139.129 | 0.000  | 50.0   | 100.0 | strong= | C8      | RGUA    | 14 | 138.097 | 139.709 | -1.612 | 49.0 | 93.9  | 0.0   | strong! (C8 15) |
| H8   | RGUA    | 1   | 8.122   | 8.120   | 0.002  | 50.0   | 100.0 | strong= | H8      | RGUA    | 14 | 7.850   | 7.922   | -0.072 | 50.0 | 76.0  | 0.0   | !               |
| C1'  | RGUA    | 2   | 92.817  | 92.817  | 0.000  | 50.0   | 100.0 | strong= | C1'     | RADE    | 15 | 93.197  | 93.197  | 0.000  | 50.0 | 100.0 | 100.0 | strong=         |
| H1'  | RGUA    | 2   | 5.916   | 5.917   | -0.001 | 50.0   | 100.0 | strong= | H1'     | RADE    | 15 | 5.949   | 5.950   | -0.001 | 50.0 | 100.0 | 100.0 | strong=         |
| C8   | RGUA    | 2   | 136.839 | 136.839 | 0.000  | 50.0   | 100.0 | strong= | C2      | RADE    | 15 | 153.724 | 153.724 | 0.000  | 50.0 | 100.0 | 100.0 | strong=         |
| H8   | RGUA    | 2   | 7.514   | 7.516   | -0.002 | 50.0   | 100.0 | strong= | H2      | RADE    | 15 | 7.627   | 7.628   | -0.001 | 50.0 | 99.9  | 100.0 | strong=         |
| C1'  | RGUA    | 3   | 93.290  | 93.290  | 0.000  | 50.0   | 100.0 | strong= | C8      | RADE    | 15 | 139.895 | 139.895 | 0.000  | 50.0 | 100.0 | 100.0 | strong=         |
| H1'  | RGUA    | 3   | 5.769   | 5.776   | -0.007 | 50.0   | 97.3  | strong= | H8      | RADE    | 15 | 7.833   | 7.835   | -0.002 | 50.0 | 100.0 | 100.0 | strong=         |
| C8   | RGUA    | 3   | 136.166 | 136.166 | 0.000  | 50.0   | 100.0 | strong= | C1'     | URA     | 16 | 93.063  | 93.063  | 0.000  | 50.0 | 100.0 | 100.0 | strong=         |
| H8   | RGUA    | 3   | 7.190   | 7.191   | -0.001 | 50.0   | 100.0 | strong= | H1'     | URA     | 16 | 5.406   | 5.402   | 0.004  | 50.0 | 99.8  | 100.0 | strong=         |
| C1'  | URA     | 4   | 93.766  | 93.766  | 0.000  | 50.0   | 100.0 | strong= | C5      | URA     | 16 | 103.152 | 103.152 | 0.000  | 50.0 | 100.0 | 100.0 | strong=         |
| H1'  | URA     | 4   | 5.556   | 5.558   | -0.002 | 50.0   | 100.0 | strong= | H5      | URA     | 16 | 4.977   | 4.979   | -0.002 | 50.0 | 100.0 | 100.0 | strong=         |
| C5   | URA     | 4   | 102.610 | 102.610 | 0.000  | 50.0   | 100.0 | strong= | C6      | URA     | 16 | 140.727 | 140.711 | 0.016  | 50.0 | 99.8  | 100.0 | strong=         |
| H5   | URA     | 4   | 5.068   | 5.070   | -0.002 | 50.0   | 100.0 | strong= | H6      | URA     | 16 | 7.444   | 7.445   | -0.001 | 50.0 | 100.0 | 100.0 | strong=         |
| C6   | URA     | 4   | 141.696 | 141.696 | 0.000  | 50.0   | 100.0 | strong= | C1'     | RGUA    | 17 | 92.392  | 92.392  | 0.000  | 50.0 | 100.0 | 100.0 | strong=         |
| H6   | URA     | 4   | 7.713   | 7.712   | 0.001  | 50.0   | 100.0 | strong= | H1'     | RGUA    | 17 | 5.699   | 5.700   | -0.001 | 50.0 | 100.0 | 100.0 | strong=         |
| C1'  | RCYT    | 5   | 93.967  | 93.967  | 0.000  | 50.0   | 100.0 | strong= | C8      | RGUA    | 17 | 136.482 | 136.482 | 0.000  | 50.0 | 100.0 | 100.0 | strong=         |
| H1'  | RCYT    | 5   | 5.519   | 5.520   | -0.001 | 50.0   | 99.9  | strong= | H8      | RGUA    | 17 | 7.624   | 7.625   | -0.001 | 50.0 | 100.0 | 100.0 | strong=         |
| C5   | RCYT    | 5   | 98.203  | 98.203  | 0.000  | 50.0   | 100.0 | strong= | C1'     | RADE    | 18 | 92.765  | 92.765  | 0.000  | 50.0 | 100.0 | 100.0 | strong=         |
| H5   | RCYT    | 5   | 5.673   | 5.674   | -0.001 | 50.0   | 100.0 | strong= | H1'     | RADE    | 18 | 5.885   | 5.885   | 0.000  | 50.0 | 100.0 | 100.0 | strong=         |
| C6   | RCYT    | 5   | 141.386 | 141.386 | 0.000  | 50.0   | 100.0 | strong= | C2      | RADE    | 18 | 154.103 | 154.103 | 0.000  | 50.0 | 100.0 | 100.0 | strong=         |
| H6   | RCYT    | 5   | 7.801   | 7.799   | 0.002  | 50.0   | 100.0 | strong= | H2      | RADE    | 18 | 7.699   | 7.710   | -0.011 | 50.0 | 99.9  | 100.0 | strong=         |
| C1'  | RADE    | 6   | 93.098  | 93.098  | 0.000  | 50.0   | 100.0 | strong= | C8      | RADE    | 18 | 139.596 | 139.596 | 0.000  | 50.0 | 100.0 | 100.0 | strong=         |
| H1'  | RADE    | 6   | 5.834   | 5.833   | 0.001  | 50.0   | 100.0 | strong= | H8      | RADE    | 18 | 7.870   | 7.867   | 0.003  | 50.0 | 100.0 | 100.0 | strong=         |
| C2   | RADE    | 6   | 153.072 | 153.072 | 0.000  | 50.0   | 100.0 | strong= | C1'     | RCYT    | 19 | 93.733  | 93.733  | 0.000  | 50.0 | 100.0 | 100.0 | strong=         |
| H2   | RADE    | 6   | 7.226   | 7.225   | 0.001  | 50.0   | 100.0 | strong= | H1'     | RCYT    | 19 | 5.350   | 5.351   | -0.001 | 50.0 | 100.0 | 100.0 | strong=         |
| C8   | RADE    | 6   | 139.749 | 139.749 | 0.000  | 50.0   | 100.0 | strong= | C5      | RCYT    | 19 | 97.193  | 97.193  | 0.000  | 50.0 | 100.0 | 100.0 | strong=         |
| H8   | RADE    | 6   | 8.045   | 8.046   | -0.001 | 50.0   | 100.0 | strong= | H5      | RCYT    | 19 | 5.158   | 5.158   | 0.000  | 50.0 | 100.0 | 100.0 | strong=         |
| C1'  | URA     | 7   | 93.362  | 93.362  | 0.000  | 50.0   | 100.0 | strong= | C6      | RCYT    | 19 | 140.684 | 140.699 | -0.015 | 50.0 | 99.8  | 100.0 | strong=         |
| H1'  | URA     | 7   | 5.422   | 5.419   | 0.003  | 50.0   | 100.0 | strong= | H6      | RCYT    | 19 | 7.453   | 7.452   | 0.001  | 50.0 | 100.0 | 100.0 | strong=         |
| C5   | URA     | 7   | 102.493 | 102.493 | 0.000  | 50.0   | 100.0 | strong= | C1'     | RCYT    | 20 | 94.315  | 94.315  | 0.000  | 50.0 | 100.0 | 100.0 | strong=         |
| H5   | URA     | 7   | 4.932   | 4.933   | -0.001 | 50.0   | 100.0 | strong= | H1'     | RCYT    | 20 | 5.484   | 5.485   | -0.001 | 50.0 | 99.2  | 100.0 | strong=         |
| C6   | URA     | 7   | 141.565 | 141.565 | 0.000  | 50.0   | 100.0 | strong= | C5      | RCYT    | 20 | 97.637  | 97.637  | 0.000  | 50.0 | 100.0 | 100.0 | strong=         |
| H6   | URA     | 7   | 7.596   | 7.598   | -0.002 | 50.0   | 100.0 | strong= | H5      | RCYT    | 20 | 5.405   | 5.406   | -0.001 | 50.0 | 99.8  | 100.0 | strong=         |
| C1'  | RCYT    | 8   | 93.823  | 93.823  | 0.000  | 50.0   | 100.0 | strong= | C6      | RCYT    | 20 | 141.510 | 141.510 | 0.000  | 50.0 | 100.0 | 100.0 | strong=         |
| H1'  | RCYT    | 8   | 5.460   | 5.461   | -0.001 | 50.0   | 100.0 | strong= | H6      | RCYT    | 20 | 7.731   | 7.730   | 0.001  | 50.0 | 100.0 | 100.0 | strong=         |
| C5   | RCYT    | 8   | 97.632  | 97.632  | 0.000  | 50.0   | 100.0 | strong= | C1'     | RCYT    | 21 | 92.825  | 92.825  | 0.000  | 50.0 | 100.0 | 100.0 | strong=         |
| H5   | RCYT    | 8   | 5.375   | 5.381   | -0.006 | 50.0   | 99.9  | strong= | H1'     | RCYT    | 21 | 5.742   | 5.748   | -0.006 | 50.0 | 100.0 | 100.0 | strong=         |
| C6   | RCYT    | 8   | 141.058 | 141.058 | 0.000  | 50.0   | 100.0 | strong= | C5      | RCYT    | 21 | 98.102  | 98.102  | 0.000  | 50.0 | 100.0 | 100.0 | strong=         |
| H6   | RCYT    | 8   | 7.559   | 7.561   | -0.002 | 50.0   | 100.0 | strong= | H5      | RCYT    | 21 | 5.465   | 5.470   | -0.005 | 50.0 | 99.7  | 100.0 | strong=         |
| C1'  | RADE    | 9   | 92.484  | 92.470  | 0.014  | 50.0   | 55.8  | =       | C6      | RCYT    | 21 | 141.876 | 141.836 | 0.040  | 50.0 | 98.0  | 98.0  | strong=         |
| H1'  | RADE    | 9   | 5.670   | 5.666   | 0.004  | 50.0   | 57.4  | =       | H6      | RCYT    | 21 | 7.649   | 7.648   | 0.001  | 50.0 | 99.5  | 100.0 | strong=         |
| C2   | RADE    | 9   | 154.507 | 154.534 | -0.027 | 50.0   | 98.0  | strong= |         |         |    |         |         |        |      |       |       |                 |
| H2   | RADE    | 9   | 7.254   | 7.254   | 0.000  | 50.0   | 98.0  | strong= |         |         |    |         |         |        |      |       |       |                 |
| C8   | RADE    | 9   | 139.655 | 141.836 | -2.181 | 49.0   | 51.0  | !       |         |         |    |         |         |        |      |       |       |                 |
| H8   | RADE    | 9   | 7.922   | 8.229   | -0.307 | 50.0   | 50.0  | 36.0    | !       |         |    |         |         |        |      |       |       |                 |
| C1'  | RGUA    | 10  | 89.976  | 89.935  | 0.041  | 50.0   | 58.0  | =       |         |         |    |         |         |        |      |       |       |                 |
| H1'  | RGUA    | 10  | 5.102   | 5.105   | -0.003 | 50.0   | 58.0  | 58.0    | !       |         |    |         |         |        |      |       |       |                 |
| C8   | RGUA    | 10  | 139.909 | 138.097 | 1.812  | 49.0   | 67.3  | 28.6    | !       |         |    |         |         |        |      |       |       |                 |
| H8   | RGUA    | 10  | 7.289   | 7.852   | -0.563 | 50.0   | 70.0  | 28.0    | !       | (H8 11) |    |         |         |        |      |       |       |                 |
| C1'  | RGUA    | 11  | 89.284  | 91.861  | -2.577 | 50.0   | 54.0  | 2.0     | !       |         |    |         |         |        |      |       |       |                 |
| H1'  | RGUA    | 11  | 5.660   | 5.392   | 0.268  | 50.0   | 54.0  | 22.0    | !       |         |    |         |         |        |      |       |       |                 |
| C8   | RGUA    | 11  | 140.238 | 138.097 | 2.141  | 21.0   | 61.9  | 9.5     | !       |         |    |         |         |        |      |       |       |                 |
| H8   | RGUA    | 11  | 7.853   | 7.257   | 0.596  | 50.0   | 59.2  | 30.0    | !       |         |    |         |         |        |      |       |       |                 |
| C1'  | RADE    | 12  | 90.619  | 90.619  | 0.000  | 50.0   | 100.0 | strong= |         |         |    |         |         |        |      |       |       |                 |
| H1'  | RADE    | 12  | 5.828   | 5.828   | 0.000  | 50.0   | 99.9  | strong= |         |         |    |         |         |        |      |       |       |                 |
| C2   | RADE    | 12  | 155.084 | 155.005 | 0.079  | 50.0   | 79.5  | 76.0    | =       |         |    |         |         |        |      |       |       |                 |
| H2   | RADE    | 12  | 7.923   | 7.905   | 0.018  | 50.0   | 75.7  | 76.0    | =       |         |    |         |         |        |      |       |       |                 |
| C8   | RADE    | 12  | 141.834 | 141.836 | -0.002 | 49.0   | 95.9  | 95.9    | strong= |         |    |         |         |        |      |       |       |                 |
| H8   | RADE    | 12  | 8.228   | 8.229   | -0.001 | 50.0   | 96.0  | 96.0    | strong= |         |    |         |         |        |      |       |       |                 |
| C1'  | RCYT    | 13  | 91.890  | 91.918  | -0.028 | 50.0   | 93.9  | 94.0    | strong= |         |    |         |         |        |      |       |       |                 |
| H1'  | RCYT    | 13  | 5.857   | 5.859   | -0.002 | 50.0   | 93.9  | 94.0    | strong= |         |    |         |         |        |      |       |       |                 |
| C5   | RCYT    | 13  | 98.627  | 98.627  | 0.000  | 50.0   | 100.0 | strong= |         |         |    |         |         |        |      |       |       |                 |
| H5   | RCYT    | 13  | 5.753   | 5.754   | -0.001 | 50.0   | 100.0 | strong= |         |         |    |         |         |        |      |       |       |                 |
| C6   | RCYT    | 13  | 143.158 | 143.158 | 0.000  | 50.0   | 100.0 | strong= |         |         |    |         |         |        |      |       |       |                 |





**Table S9.** FLYA chemical shift assignments for FZL2

For each assigned atom the table contains the following information: ‘Ref’, manually determined reference chemical shift (ppm). ‘Shift’, consolidated chemical shift determined by FLYA (ppm). ‘Dev’, deviation between the consolidated chemical shift determined by FLYA and the reference chemical shift (ppm). ‘Extent’, number of individual runs of the FLYA algorithm in which the atom was assigned. ‘inside’, percentage of the chemical shift values from the individual FLYA runs that deviate by less than the tolerance of 0.02 ppm for <sup>1</sup>H and 0.3 ppm for <sup>13</sup>C from the consolidated chemical shift value. Assignments for which this percentage is at least 80% are labelled as ‘strong’. ‘inref’, percentage of the chemical shift values from the individual FLYA runs that agree with the reference chemical shift value within the tolerance. Atoms for which the consolidated and reference chemical shifts agree within the tolerance are labelled with ‘=’ (green). Disagreement between the two shifts is indicated by ‘!’ (magenta). For erroneous consolidated shifts the sequentially closest atom with a reference chemical shift within the tolerance is indicated in parenthesis if it is located in the same residue (no residue number given) or in the immediately preceding or following residue (residue number given). Atoms for which our chemical shift statistics could be used are highlighted in cyan.

| Atom | Residue | Ref     | Shift   | Dev    | Extent | inside | inref |         | C8  | RADE    | 13      | 141.486 | 141.510 | -0.024 | 50.0  | 88.0  | 88.0    | strong= |  |
|------|---------|---------|---------|--------|--------|--------|-------|---------|-----|---------|---------|---------|---------|--------|-------|-------|---------|---------|--|
| C1   | RGIA 1  | 90.739  | 90.739  | 0.000  | 50.0   | 98.0   | 98.0  | strong= | H8  | RADE 13 | 8.279   | 8.281   | -0.002  | 50.0   | 88.0  | 88.0  | strong= |         |  |
| H1   | RGIA 1  | 5.786   | 5.787   | -0.001 | 50.0   | 99.6   | 100.0 | strong= | C1' | RCYT 14 | 91.912  | 91.707  | -0.205  | 48.0   | 80.8  | 43.8  | strong= |         |  |
| C8   | RGIA 1  | 139.212 | 139.188 | 0.024  | 50.0   | 100.0  | 100.0 | strong= | H1' | RCYT 14 | 5.852   | 5.867   | -0.015  | 50.0   | 91.6  | 92.0  | strong= |         |  |
| H8   | RGIA 1  | 8.155   | 8.155   | 0.000  | 50.0   | 99.7   | 100.0 | strong= | C5  | RCYT 14 | 98.111  | 98.059  | 0.052   | 50.0   | 94.8  | 94.0  | strong= |         |  |
| C1'  | RGIA 2  | 92.357  | 92.432  | -0.075 | 49.0   | 64.6   | 55.1  | =       | H5  | RCYT 14 | 5.625   | 5.625   | 0.000   | 50.0   | 93.9  | 94.0  | strong= |         |  |
| H1'  | RGIA 2  | 5.934   | 5.936   | -0.002 | 50.0   | 54.0   | 54.0  | =       | C6  | RCYT 14 | 142.743 | 142.743 | 0.000   | 50.0   | 94.0  | 94.0  | strong= |         |  |
| C8   | RGIA 2  | 137.127 | 137.160 | -0.033 | 50.0   | 98.0   | 98.0  | strong= | H6  | RCYT 14 | 7.734   | 7.733   | 0.001   | 50.0   | 94.0  | 94.0  | strong= |         |  |
| H8   | RGIA 2  | 7.657   | 7.664   | -0.007 | 49.0   | 92.1   | 98.0  | strong= | C1' | RGIA 15 | 92.867  | 92.861  | 0.006   | 47.0   | 39.0  | 36.2  | =       |         |  |
| C1'  | RGIA 2  | 93.419  | 93.383  | 0.036  | 49.0   | 80.2   | 81.6  | strong= | H1' | RGIA 15 | 5.667   | 5.498   | -0.169  | 50.0   | 38.0  | 26.0  | !       |         |  |
| H1'  | RGIA 3  | 5.808   | 5.802   | 0.006  | 50.0   | 83.7   | 84.0  | strong= | C8  | RGIA 15 | 138.109 | 139.706 | -1.597  | 49.0   | 63.9  | 14.3  | !       |         |  |
| C8   | RGIA 3  | 136.822 | 136.856 | -0.034 | 50.0   | 48.0   | 48.0  | =       | H8  | RGIA 15 | 7.907   | 7.853   | 0.054   | 50.0   | 60.2  | 22.0  | !       |         |  |
| H8   | RGIA 3  | 7.289   | 7.293   | -0.004 | 50.0   | 85.9   | 86.0  | strong= | C1' | RADE 16 | 93.085  | 93.070  | 0.015   | 50.0   | 100.0 | 100.0 | strong= |         |  |
| C1'  | RCYT 4  | 93.843  | 93.843  | 0.000  | 48.0   | 89.6   | 89.6  | strong= | H1  | RADE 16 | 5.933   | 5.935   | -0.002  | 50.0   | 100.0 | 100.0 | strong= |         |  |
| H1'  | RCYT 4  | 5.523   | 5.527   | -0.006 | 50.0   | 86.0   | 86.0  | strong= | C2  | RADE 16 | 153.698 | 153.698 | 0.000   | 49.0   | 95.9  | 95.9  | strong= |         |  |
| C5   | RCYT 4  | 97.400  | 97.421  | -0.021 | 50.0   | 92.0   | 94.0  | strong= | H2  | RADE 16 | 7.641   | 7.635   | 0.006   | 50.0   | 93.6  | 94.0  | strong= |         |  |
| H5   | RCYT 4  | 5.348   | 5.348   | 0.000  | 50.0   | 86.0   | 86.0  | strong= | C8  | RADE 16 | 139.743 | 139.778 | -0.035  | 50.0   | 100.0 | 100.0 | strong= |         |  |
| C6   | RCYT 4  | 140.546 | 140.513 | 0.033  | 50.0   | 86.8   | 86.0  | strong= | H8  | RADE 16 | 7.812   | 7.817   | -0.005  | 50.0   | 100.0 | 100.0 | strong= |         |  |
| H6   | RCYT 4  | 7.672   | 7.676   | -0.004 | 50.0   | 86.0   | 86.0  | strong= | C1' | URA 17  | 93.028  | 93.044  | -0.016  | 50.0   | 100.0 | 100.0 | strong= |         |  |
| C1'  | RCYT 5  | 93.950  | 93.880  | 0.070  | 50.0   | 100.0  | 100.0 | strong= | H1' | URA 17  | 5.432   | 5.430   | 0.002   | 50.0   | 100.0 | 100.0 | strong= |         |  |
| H1'  | RCYT 5  | 5.458   | 5.462   | -0.004 | 50.0   | 100.0  | 100.0 | strong= | C5  | URA 17  | 103.075 | 103.075 | 0.000   | 50.0   | 100.0 | 100.0 | strong= |         |  |
| C5   | RCYT 5  | 98.113  | 98.111  | 0.002  | 50.0   | 100.0  | 100.0 | strong= | H5  | URA 17  | 4.994   | 4.996   | -0.002  | 50.0   | 100.0 | 100.0 | strong= |         |  |
| H5   | RCYT 5  | 5.532   | 5.531   | 0.001  | 50.0   | 100.0  | 100.0 | strong= | C6  | URA 17  | 140.817 | 140.817 | 0.000   | 50.0   | 100.0 | 100.0 | strong= |         |  |
| C6   | RCYT 5  | 140.954 | 140.954 | 0.000  | 50.0   | 100.0  | 100.0 | strong= | H6  | URA 17  | 7.467   | 7.470   | -0.003  | 50.0   | 100.0 | 100.0 | strong= |         |  |
| H6   | RCYT 5  | 7.728   | 7.729   | -0.001 | 50.0   | 100.0  | 100.0 | strong= | C1' | RGIA 18 | 92.463  | 92.474  | -0.011  | 50.0   | 95.5  | 100.0 | strong= |         |  |
| C1'  | RADE 6  | 93.151  | 93.132  | 0.019  | 50.0   | 100.0  | 100.0 | strong= | H1' | RGIA 18 | 5.764   | 5.765   | -0.001  | 50.0   | 100.0 | 100.0 | strong= |         |  |
| H1'  | RADE 6  | 5.901   | 5.902   | -0.001 | 50.0   | 100.0  | 100.0 | strong= | C8  | RGIA 18 | 136.284 | 136.288 | -0.004  | 50.0   | 100.0 | 100.0 | strong= |         |  |
| C2   | RADE 6  | 153.190 | 153.190 | 0.000  | 50.0   | 100.0  | 100.0 | strong= | H8  | RGIA 18 | 7.617   | 7.622   | -0.005  | 50.0   | 99.9  | 100.0 | strong= |         |  |
| H2   | RADE 6  | 7.303   | 7.303   | 0.000  | 50.0   | 100.0  | 100.0 | strong= | C1' | RGIA 19 | 92.867  | 92.867  | 0.000   | 50.0   | 100.0 | 100.0 | strong= |         |  |
| C8   | RADE 6  | 139.736 | 139.750 | -0.014 | 50.0   | 100.0  | 100.0 | strong= | H1' | RGIA 19 | 5.666   | 5.666   | 0.000   | 50.0   | 99.9  | 100.0 | strong= |         |  |
| H8   | RADE 6  | 8.061   | 8.066   | -0.005 | 50.0   | 100.0  | 100.0 | strong= | C8  | RGIA 19 | 135.978 | 135.982 | -0.004  | 50.0   | 100.0 | 100.0 | strong= |         |  |
| C1'  | URA 7   | 93.275  | 93.388  | -0.113 | 50.0   | 100.0  | 100.0 | strong= | H8  | RGIA 19 | 7.214   | 7.216   | -0.002  | 50.0   | 100.0 | 100.0 | strong= |         |  |
| H1'  | URA 7   | 5.462   | 5.462   | 0.000  | 50.0   | 100.0  | 100.0 | strong= | C1' | URA 20  | 93.764  | 92.327  | 1.437   | 50.0   | 50.6  | 14.0  | !       |         |  |
| C5   | URA 7   | 102.615 | 102.615 | 0.000  | 50.0   | 100.0  | 100.0 | strong= | H1' | URA 20  | 5.485   | 5.935   | -0.450  | 50.0   | 50.0  | 46.0  | !       |         |  |
| H5   | URA 7   | 4.967   | 4.969   | -0.002 | 50.0   | 100.0  | 100.0 | strong= | C5  | URA 20  | 104.078 | 104.078 | 0.000   | 50.0   | 100.0 | 100.0 | strong= |         |  |
| C6   | URA 7   | 141.523 | 141.366 | 0.157  | 50.0   | 96.3   | 90.0  | strong= | H5  | URA 20  | 5.386   | 5.386   | 0.000   | 50.0   | 100.0 | 100.0 | strong= |         |  |
| H6   | URA 7   | 7.633   | 7.635   | -0.002 | 50.0   | 99.7   | 100.0 | strong= | C6  | URA 20  | 140.628 | 140.546 | 0.082   | 50.0   | 100.0 | 100.0 | strong= |         |  |
| C1'  | RCYT 8  | 93.707  | 93.773  | -0.066 | 47.0   | 94.8   | 100.0 | strong= | H6  | URA 20  | 7.690   | 7.688   | 0.002   | 50.0   | 100.0 | 100.0 | strong= |         |  |
| H1'  | RCYT 8  | 5.495   | 5.495   | 0.000  | 50.0   | 68.2   | 64.0  | =       | C1' | RCYT 21 | 93.947  | 93.740  | 0.207   | 46.0   | 47.4  | 45.7  | =       |         |  |
| C5   | RCYT 8  | 97.630  | 97.604  | 0.026  | 50.0   | 96.8   | 100.0 | strong= | H1' | RCYT 21 | 5.636   | 5.490   | 0.146   | 50.0   | 49.9  | 12.0  | !       |         |  |
| H5   | RCYT 8  | 5.419   | 5.420   | -0.001 | 50.0   | 86.0   | 86.0  | strong= | C5  | RCYT 21 | 97.593  | 97.593  | 0.000   | 50.0   | 100.0 | 100.0 | strong= |         |  |
| C6   | RCYT 8  | 141.180 | 141.086 | 0.094  | 50.0   | 85.7   | 86.0  | strong= | H5  | RCYT 21 | 5.672   | 5.670   | 0.002   | 50.0   | 99.7  | 100.0 | strong= |         |  |
| H6   | RCYT 8  | 7.624   | 7.634   | -0.010 | 50.0   | 85.9   | 86.0  | strong= | C6  | RCYT 21 | 142.541 | 142.541 | 0.000   | 50.0   | 100.0 | 100.0 | strong= |         |  |
| C1'  | RADE 9  | 92.727  | 91.528  | 1.199  | 50.0   | 44.0   | 28.0  | !       | H6  | RCYT 21 | 7.944   | 7.943   | 0.001   | 50.0   | 99.9  | 100.0 | strong= |         |  |
| H1'  | RADE 9  | 5.641   | 5.497   | 1.144  | 50.0   | 50.0   | 36.0  | !       | C1' | RCYT 22 | 92.789  | 92.748  | 0.041   | 50.0   | 99.9  | 100.0 | strong= |         |  |
| C2   | RADE 9  | 153.570 | 153.582 | -0.012 | 49.0   | 87.1   | 87.8  | strong= | H1' | RCYT 22 | 5.752   | 5.752   | 0.000   | 50.0   | 82.0  | 82.0  | strong= |         |  |
| H2   | RADE 9  | 6.955   | 6.955   | 0.000  | 50.0   | 78.0   | 78.0  | =       | C5  | RCYT 22 | 98.176  | 98.166  | 0.010   | 50.0   | 100.0 | 100.0 | strong= |         |  |
| C8   | RADE 9  | 139.728 | 139.921 | -0.193 | 50.0   | 82.4   | 82.0  | strong= | H5  | RCYT 22 | 5.560   | 5.560   | 0.000   | 50.0   | 100.0 | 100.0 | strong= |         |  |
| H8   | RADE 9  | 7.855   | 7.792   | 0.063  | 50.0   | 62.1   | 20.0  | !       | C6  | RCYT 22 | 141.808 | 141.779 | 0.029   | 50.0   | 100.0 | 100.0 | strong= |         |  |
| C1'  | RADE 10 | 91.522  | 91.678  | -0.156 | 50.0   | 80.5   | 56.0  | strong= | H6  | RCYT 22 | 7.656   | 7.656   | 0.000   | 50.0   | 99.6  | 100.0 | strong= |         |  |
| H1'  | RADE 10 | 5.498   | 5.866   | -0.368 | 50.0   | 75.8   | 22.0  | !       |     |         |         |         |         |        |       |       |         |         |  |
| C2   | RADE 10 | 155.299 | 155.214 | 0.085  | 50.0   | 73.0   | 76.0  | =       |     |         |         |         |         |        |       |       |         |         |  |
| H2   | RADE 10 | 7.905   | 7.908   | -0.003 | 50.0   | 74.9   | 76.0  | =       |     |         |         |         |         |        |       |       |         |         |  |
| C8   | RADE 10 | 139.954 | 140.095 | -0.141 | 50.0   | 83.8   | 88.0  | strong= |     |         |         |         |         |        |       |       |         |         |  |
| H8   | RADE 10 | 7.794   | 7.912   | -0.118 | 50.0   | 67.6   | 22.0  | !       |     |         |         |         |         |        |       |       |         |         |  |
| C1'  | RGIA 11 | 89.516  | 89.516  | 0.000  | 50.0   | 76.0   | 76.0  | =       |     |         |         |         |         |        |       |       |         |         |  |
| H1'  | RGIA 11 | 5.141   | 5.139   | 0.002  | 50.0   | 76.0   | 76.0  | =       |     |         |         |         |         |        |       |       |         |         |  |
| C8   | RGIA 11 | 140.716 | 140.666 | 0.050  | 50.0   | 50.5   | 50.0  | =       |     |         |         |         |         |        |       |       |         |         |  |
| H8   | RGIA 11 | 7.289   | 7.288   | 0.001  | 50.0   | 80.0   | 80.0  | =       |     |         |         |         |         |        |       |       |         |         |  |
| C1'  | RGIA 12 | 89.330  | 92.882  | -3.552 | 49.0   | 55.1   | 24.5  | !       |     |         |         |         |         |        |       |       |         |         |  |
| H1'  | RGIA 12 | 5.783   | 5.665   | 0.118  | 50.0   | 56.2   | 0.0   | !       |     |         |         |         |         |        |       |       |         |         |  |
| C8   | RGIA 12 | 140.144 | 138.116 | 2.028  | 50.0   | 58.0   | 20.0  | !       |     |         |         |         |         |        |       |       |         |         |  |
| H8   | RGIA 12 | 7.931   | 7.906   | 0.025  | 50.0   | 61.6   | 2.0   | !       |     |         |         |         |         |        |       |       |         |         |  |
| C1'  | RADE 13 | 91.532  | 92.723  | -1.191 | 49.0   | 55.1   | 6.1   | !       |     |         |         |         |         |        |       |       |         |         |  |
| H1'  | RADE 13 | 5.871   | 5.629   | 0.242  | 50.0   | 83.3   | 4.0   | strong! |     |         |         |         |         |        |       |       |         |         |  |
| C2   | RADE 13 | 155.022 | 155.109 | -0.087 | 49.0   | 91.5   | 95.9  | strong= |     |         |         |         |         |        |       |       |         |         |  |
| H2   | RADE 13 | 7.918   | 7.907   | 0.011  | 50.0   | 90.6   | 94.0  | strong= |     |         |         |         |         |        |       |       |         |         |  |

The .wv file was edited to exclude the G-U wobble:  
 watsoncrick strand1=1-2 strand2=21-22  
 watsoncrick strand1=4-8 strand2=15-19







The program CHES2FLYA uses as input a file with secondary structure information in the .ct file format. This can be created manually or e.g. on "www.rnasoft.ca". ches2flya creates then a .prot file containing chemical shift prediction of all nucleotides of RNAs. Additionally an angle restraint file (.aco file), a sequence file (.seq file) are prepared. These files are then used as an input for FLYA automated assignment algorithm within CYANA (P.Guntert). ches2flya requires the statistics file Statfile.tab.

Usage: ches2flya [options]

```
#####
-h help
-c prediction interval defined by the percentage of resonances in it [1-11]
  (default 2) 1: 50%, 2: 60%, 3: 70%, 4: 80, 5: 90%, 6: 95%
  7: 98%, 8: 99%, 9: 99.5%, 10: 99.8%, 11: 99.9%
-f file with statistics table (default Statfile.tab)
-s file with RNA sequence and secondary structure (default rnass.ct)
  The file has to be in the .ct format and can be created e.g. on http://www.rnasoft.ca/ .
#####
```

```
./ches2flya -h #--> Help appears
./ches2flya #--> Creates 60% prediction intervals for each shift of the secondary structure file 'rnass.ct' (Standard input file)
./ches2flya -s 'input.ct' #--> Creates 60% prediction intervals for each shift of the secondary structure file 'input.ct'
./ches2flya -s 'input.ct' -c 3 #--> Creates 70% prediction intervals for each shift of the secondary structure file 'input.ct'
```

```
#####
# Given example:
# RNA stemloop FZL4
#####
cd CHES2FLYA/demo
./ches2flya -s FZL4.ct -f ../Statfile.tab #--> generates: cyana.aco, cyana.prot, cyana.seq, cyana.wc
```

```
#####
#-----FLYA----(Peter Guntert)-----#
#####
# requires Cyana3.9
```

```
# Unpack the FLYA.tar file by
tar -xvf FLYA.tar
```

```
# FLYA uses two directories, one with the original input data ("orig"), one for the
# actual calculation with the name of the project ("FZL4")
# "orig" should be accessible from "FZL4" via "../orig"
mkdir FZL4 #--> already created from the tar file
mkdir orig #--> already created from the tar file
```

```
#required files in these directories:
# peak lists of the 1H-13C HSQC, 2D TOCSY and 2D NOESY spectra and for comparison also
# the assigned shift lists (if available) in xeasy format
```

```
./orig/FZL4_HSQC_PeakList
./orig/FZL4_NOESY_PeakList
./orig/FZL4_TOCSY_PeakList
./orig/FZL4_HSQC_ShiftList
./orig/FZL4_NOESY_ShiftList
./orig/FZL4_TOCSY_ShiftList
./orig/FZL4.aco #--> from cp ./CHES2FLYA/cyana.aco ./orig/FZL4.aco
./orig/FZL4.prot #--> from cp ./CHES2FLYA/cyana.prot ./orig/FZL4.prot
./orig/FZL4.wc #--> from cp ./CHES2FLYA/cyana.wc ./orig/FZL4.wc
```

```
# CYANA run macros
./FZL4/REP.cya #--> please see the content of REP.cya at the end
./FZL4/init.cya #--> please see the content of init.cya at the end
./FZL4/FLYA.cya #--> please see the content of FLYA.cya at the end
./FZL4/FZL4.seq #--> from cp ./CHES2FLYA/cyana.seq ./orig/FZL4.seq
```

```
# in FZL4 directory:
# source CYANA 3.9 (or later) executables and run REP.cya followed by FLYA.cya
```

```
cyana PREP.cya --> this will generate the following files:
stat.prot
ref.prot
NOESY.peaks
TOCSY.peaks
C13H1.peaks
all.aco
```

```
cyana FLYA.cya --> this will generate the following files:
flya.tab
flya.prot
TOCSY_exp.peaks
TOCSY_asn.peaks
NOESY_exp.peaks
NOESY_asn.peaks
C13H1_exp.peaks
C13H1_asn.peaks
flya.txt
```

```
#####--PREP.cya#####
dir := ../orig
input := FZL4_NOESY_PeakList,FZL4_TOCSY_PeakList,FZL4_HSQC_PeakList
spectra := NOESY,TOCSY,C13H1
format := NOESY H1 H2, TOCSY H1 H2, C13H1 C H
```

```
read prot $dir/FZL4.prot unknown=warn
write prot stat.prot
```

```
read prot $dir/FZL4_NOESY_ShiftList| unknown=warn
read prot $dir/FZL4_TOCSY_ShiftList| unknown=warn add
read prot $dir/FZL4_HSQC_ShiftList| unknown=warn add
write prot ref.prot
```

```
do i 1 length('spectra')
  read prot ref.prot
  read peaks $dir/$input(i) format="$format(i)"
  write peaks $spectra(i) names
end do
```

```
read $dir/FZL4.aco unknown=warn
write all.aco
```

```
system "cp -a $dir/FZL4.wc wc.cya"
```

```
#####--FLYA.cya#####
#noesy:=NOESY
```

```

#scalar:=TOCSY,C13H1
calibration := # NOE calibration parameters
structures := 500,20 # number of initial, final structures
steps := 10000 # number of torsion angle dynamics steps
upl_values := 2,4,5,2
randomseed := 57923 # random number generator seed
run_assign_reference:=ref.prot
run_assign_iterations:=15000
run_assign_population:=100
run_assign_statistics:=stat.prot
analyze_assign_group:="Sugar: C1\ H1\ / CONSOLIDATED, Bases: C2 H2 C5 H5 C6 H6 C8 H8 / CONSOLIDATED, Stem: 1..8 14..21 C2 H2 C5 H5 C6 H6 C8 H8 C1\ H1\ / CONSOLIDATED, ALL: CONSOLIDATED, Sugar: C1\ H1\, Bases: C2 H2 C5 H5 C6 H6 C8 H8, Stem: 1..8 14..21 C2 H2 C5 H5 C6 H6 C8 H8 C1\ H1\, ALL: *"

if (.not.existfile('start.pdb')) then
./init
read aco all.aco
wc
sugarbond
calc_all 100 #vtfmin
overview start.oww structures=20 pdb
end if

flya refprot=ref.prot noesy=$noesy scalar=$scalar runs=50 plot=
#####

#####--init.cya#####
path:=./cyanadir/macro
name:=FZL4
cyanalib
read seq $name.seq
noesy:=NOESY
scalar:=TOCSY,C13H1

tolerance:=0.02,0.02,0.3
assigncs_accH:=tolerance(1)
assigncs_accC:=tolerance(3)
assigncs_accN:=tolerance(3)

command NOESY_expect peaks
atoms select "C1\ H1\ C2 H2 C5 H5 C6 H6 C8 H8 - C*"
spectrum $peaks append distance=4.0 structures=20 probability=0.9
spectrum $peaks append distance=6.0 structures=20 probability=0.8
spectrum $peaks append distance=9.0 structures=20 probability=0.5
spectrum $peaks append distance=14.0 structures=20 probability=0.3 write
# atom select "*"
# spectrum $peaks append distance=6.0 structures=20 probability=0.01
end

command TOCSY_expect peaks
atoms select "H5 H6 URA RCYT"
spectrum $peaks skipdiagonal append write
end

command C13H1_select
atoms select "C1\ H1\ C2 H2 C5 H5 C6 H6 C8 H8"
end
#####

```
